# Supplementary material for: Rigid axially symmetrical C60-BODIPY triplet photosensitizers: effect of bridge length on singlet oxygen generation
Source: Royal Society of Chemistry journal article supplement (doi:10.1039/d0nj05085g), 2020-01-01
Supplement: d0nj05085g1.pdf [file d0nj05085g1.pdf]

Electronic Supplementary Material (ESI) for New Journal of Chemistry.  
This journal is © The Royal Society of Chemistry and the Centre National de la Recherche Scientifique 2020

---

## **Rigid Axially Symmetrical C<sub>60</sub>-BODIPY Triplet Photosensitizers: Effect of Bridge Length on Singlet Oxygen Generation**

San-E Zhu,<sup>a</sup> Jianhui Zhang,<sup>a</sup> Lifeng Dou,<sup>a</sup> Na Li,<sup>c</sup> Kunhong Hu,<sup>a</sup> Tianyu Gao,<sup>a</sup> Hongdian Lu,<sup>a</sup>  
Jingyu Si,<sup>a</sup> Xuefei Wang\*<sup>b</sup> and Wei Yang\*<sup>a</sup>

<sup>a</sup>School of Energy, Materials and Chemical Engineering, Hefei University, Hefei, Anhui 230601, China

<sup>b</sup>School of Chemistry and Chemical Engineering, University of Chinese Academy of Sciences, Beijing 100049, China

<sup>c</sup>Department of Chemical and Chemical Engineering, Hefei Normal University, Hefei, Anhui 230601, China

### **Contents**

|                                                                                      |               |
|--------------------------------------------------------------------------------------|---------------|
| <b>1. Time-resolved fluorescence spectrum of R1</b>                                  | <b>S2</b>     |
| <b>2. Nanosecond time-resolved transient absorption spectra of R1 and R2</b>         | <b>S2</b>     |
| <b>3. The spectral response of DHN and DHN with R1, R2 and MB as the sensitizers</b> | <b>S3</b>     |
| <b>4. The photostability of C<sub>60</sub>-B1 and C<sub>60</sub>-B2</b>              | <b>S3-4</b>   |
| <b>5. Calculation details</b>                                                        | <b>S4-14</b>  |
| <b>6. High resolution mass spectra</b>                                               | <b>S15-26</b> |
| <b>7. <sup>1</sup>H NMR, <sup>19</sup>F NMR and <sup>13</sup>C NMR spectra</b>       | <b>S26-36</b> |

## 1. Time-resolved fluorescence spectrum of R1

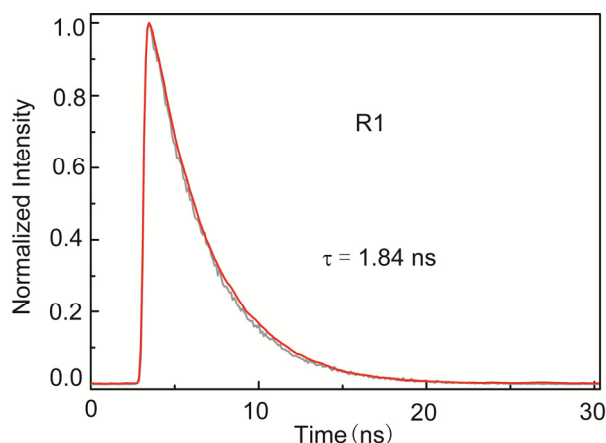

**Figure S1.** Fluorescence decay traces obtained with TCSPC of **R1** in toluene ( $1 \times 10^{-6}$  mol/L) and the results of single exponential function fitting combining a deconvolution (ex 475 nm, em 520 nm).

## 2. Nanosecond time-resolved transient absorption spectra of R1 and R2

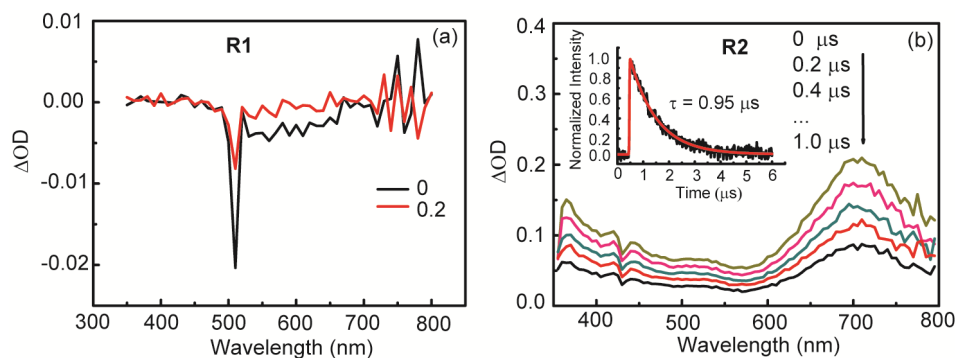

**Figure S2.** Nanosecond time-resolved transient absorption spectra of (a) **R1** and (b) **R2** in deaerated toluene upon excitation (532 nm, 7 ns fwhm, 2 mJ/pulse) at room temperature. Arrows indicate the spectral trend with time increasing. Inset shows the dynamic curves and transient absorption time profiles of **R2** at 710 nm.

The concentration of **R1** is the same with **C<sub>60</sub>-B1** and **C<sub>60</sub>-B2**, but no obvious triplet excited state was observed. The concentration of **R2** is higher than that of **C<sub>60</sub>-B1** and **C<sub>60</sub>-B2**. The data in Figure S17 (b) is to certify the triplet excited state of **C<sub>60</sub>**.

### 3. The spectral response of DHN and DHN with R1, R2 and MB as the sensitizers

As a control experiment, Figure S2a was the photo-oxidation of DHN without photosensitizer. Both **R1** and **R2** were also used as triplet photosensitizers for photocatalytic reaction, but nearly no product was observed.

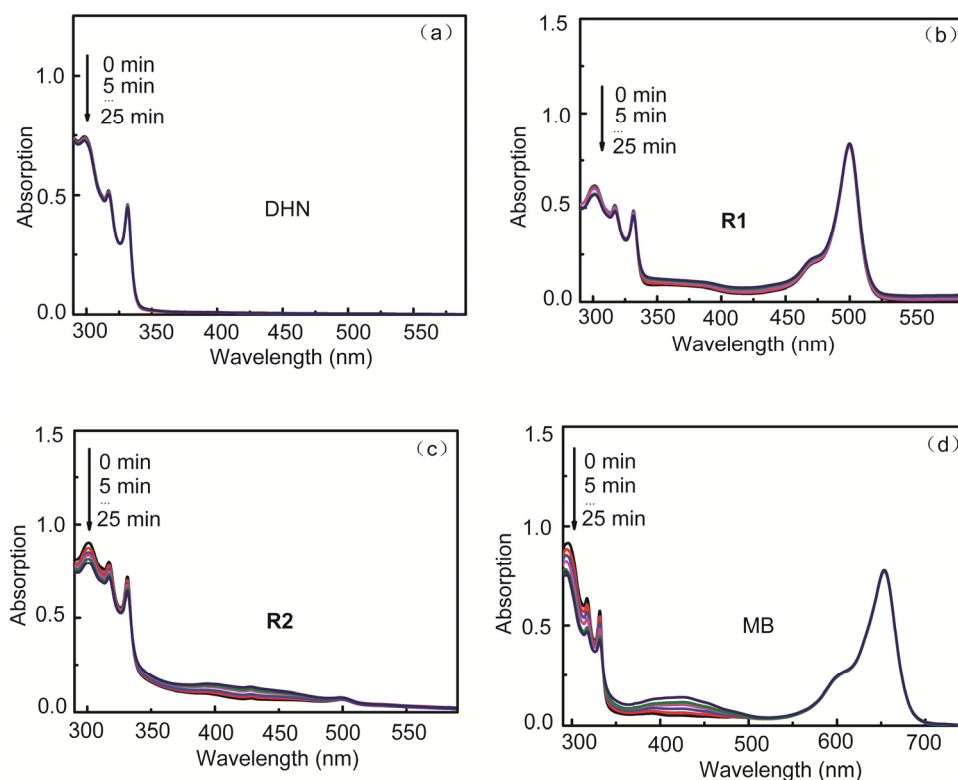

**Figure S3.** Absorption spectral changes for the photooxidation of DHN (a) without photosensitizer, (b) using **R1**, (c) **R2** and (d) **MB**.  $c[\text{sensitizers}] = 1.0 \times 10^{-5} \text{ mol L}^{-1}$ ,  $c[\text{DHN}] = 1.0 \times 10^{-4} \text{ mol L}^{-1}$ . In  $\text{CH}_2\text{Cl}_2\text{-MeOH}$  (9/1, v/v).

### 4. The photostability of C<sub>60</sub>-B1 and C<sub>60</sub>-B2

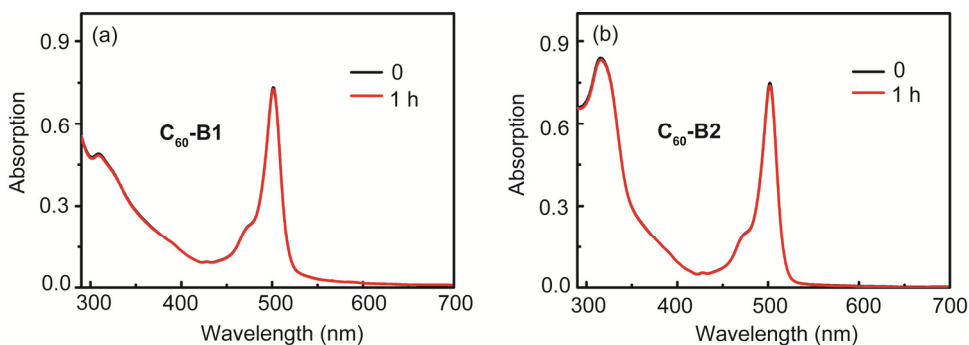

**Figure S4.** The stability of (a)  $C_{60}$ -B1 and (b)  $C_{60}$ -B2.  $c[\text{sensitizers}] = 1.0 \times 10^{-5} \text{ mol L}^{-1}$  in  $\text{CH}_2\text{Cl}_2$ -MeOH (9/1, v/v). After being exposed to light for 1 h, no bleaching is observed for both  $C_{60}$ -B1 and  $C_{60}$ -B2.

## 5. Calculation details.

The molecular structure optimization and excited state property calculation were performed at the CAM-B3LYP/3-21G level with the Gaussian 09 package.

### 5.1 The optimized structures of $C_{60}$ -B1 and $C_{60}$ -B2

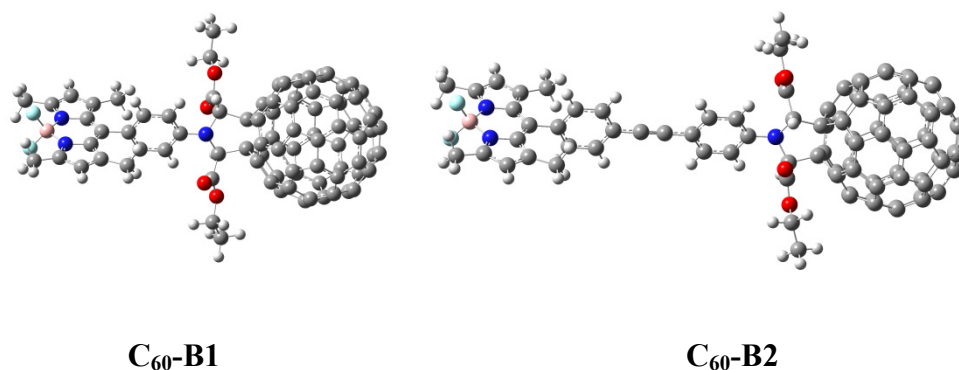

**Figure S5.** The optimized structures of  $C_{60}$ -B1 and  $C_{60}$ -B2.

### 5.2 Cartesian coordinate, the number of imaginary frequency and energy of $C_{60}$ -B1 and $C_{60}$ -B2

#### $C_{60}$ -B1

0 1

The number of imaginary frequency = 0

|   |             |             |             |
|---|-------------|-------------|-------------|
| C | -7.55503500 | -0.08347600 | 0.21190000  |
| C | -8.28965000 | 0.95671500  | -0.38419400 |
| N | -9.70167900 | 0.95557000  | -0.33238500 |

|   |              |             |             |
|---|--------------|-------------|-------------|
| B | -10.57218300 | -0.11777700 | 0.34706500  |
| N | -9.62016900  | -1.16910400 | 0.94573900  |
| C | -8.20884200  | -1.13879700 | 0.86926600  |
| C | -10.00317500 | -2.28195800 | 1.62708600  |
| C | -8.84492700  | -2.99848600 | 2.00566200  |
| C | -7.71817200  | -2.31047200 | 1.54731800  |
| C | -7.88904300  | 2.13739100  | -1.10222900 |
| C | -9.06776900  | 2.80014200  | -1.45696500 |
| C | -10.17037500 | 2.05862700  | -0.97558100 |
| F | -11.45200400 | -0.72958800 | -0.61411400 |
| F | -11.37882400 | 0.47505300  | 1.38198200  |
| C | -6.30254600  | -2.76151600 | 1.75780500  |
| C | -11.43444400 | -2.61232500 | 1.88766700  |
| C | -6.50813400  | 2.62029700  | -1.43688500 |
| C | -11.62680600 | 2.35548000  | -1.10375300 |
| H | -8.84136000  | -3.92575900 | 2.55924100  |
| H | -9.13504700  | 3.72651500  | -2.00808900 |
| H | -6.29255300  | -3.72168000 | 2.28260800  |
| H | -5.72493100  | -2.04701700 | 2.35475100  |
| H | -5.75905000  | -2.88675800 | 0.81533500  |
| H | -11.51907900 | -3.54951300 | 2.44255700  |
| H | -11.98681000 | -2.69790700 | 0.94558200  |
| H | -11.91579400 | -1.80990100 | 2.45746400  |
| H | -5.96240600  | 1.91147300  | -2.06909400 |
| H | -5.89525300  | 2.77329500  | -0.54161000 |
| H | -6.56802400  | 3.57222200  | -1.97366200 |
| H | -11.78364700 | 3.29417000  | -1.64010800 |

|   |              |             |             |
|---|--------------|-------------|-------------|
| H | -12.09327300 | 2.42002400  | -0.11482900 |
| H | -12.13838800 | 1.54552600  | -1.63537900 |
| C | -5.38067600  | -0.64097200 | -0.93744000 |
| C | -3.98666700  | -0.62224200 | -1.00622000 |
| C | -3.22462700  | -0.03625800 | 0.02331700  |
| C | -3.90883100  | 0.54528300  | 1.11072600  |
| C | -5.30191300  | 0.52997100  | 1.16675300  |
| N | -1.80978500  | -0.01680700 | -0.01461000 |
| C | -1.09754800  | 1.19653500  | 0.38112800  |
| C | -1.06664200  | -0.75423600 | -1.03286800 |
| C | -1.45523900  | 2.37244900  | -0.53482600 |
| O | -1.43109300  | 3.55422200  | 0.14659300  |
| C | -1.68837700  | 4.79975600  | -0.62556800 |
| C | -1.58961200  | 5.95015800  | 0.35689200  |
| C | -1.38577500  | -2.24507400 | -1.00758500 |
| O | -1.08474400  | -2.79314000 | -2.22793900 |
| C | -1.24411600  | -4.26370700 | -2.37628400 |
| C | -0.75996200  | -4.61555800 | -3.76947000 |
| O | -1.72353900  | 2.27197400  | -1.73702700 |
| O | -1.81552300  | -2.89274400 | -0.05333000 |
| C | 2.11590000   | 2.79337600  | 0.66291400  |
| C | 1.29526800   | 1.96858600  | -0.23239000 |
| C | 3.19706200   | 3.37807100  | -0.11739600 |
| C | 2.34817700   | 2.40058400  | 1.97167900  |
| C | 0.42935700   | 0.83341500  | 0.27344800  |
| C | 1.86731400   | 1.99532700  | -1.49689600 |
| C | 3.05500900   | 2.88141600  | -1.47071600 |

|   |            |             |             |
|---|------------|-------------|-------------|
| C | 4.47076000 | 3.54222900  | 0.44268200  |
| C | 1.78574800 | 1.11819700  | 2.44681100  |
| C | 3.67189000 | 2.55715900  | 2.55967900  |
| C | 0.45611500 | -0.51030300 | -0.68094500 |
| C | 1.00541600 | 0.32956900  | 1.61434900  |
| C | 1.88865400 | 0.81807700  | -2.33538100 |
| C | 4.18149100 | 2.57992600  | -2.22141100 |
| C | 5.65231000 | 3.22239800  | -0.34358300 |
| C | 4.71437600 | 3.12359700  | 1.81554900  |
| C | 2.76855000 | 0.51655000  | 3.32766100  |
| C | 3.93035700 | 1.39778800  | 3.40385000  |
| C | 1.33670400 | -0.38238600 | -1.90646000 |
| C | 1.05517700 | -1.58550400 | 0.25099800  |
| C | 1.21611900 | -1.09198900 | 1.58956000  |
| C | 3.10375400 | 0.53643000  | -3.13599200 |
| C | 4.20641900 | 1.37569100  | -3.07640600 |
| C | 5.50902600 | 2.75388400  | -1.65662000 |
| C | 6.63608200 | 2.60757600  | 0.54235300  |
| C | 6.05378200 | 2.54358000  | 1.88133400  |
| C | 2.93892400 | -0.87110800 | 3.35488500  |
| C | 5.21373700 | 0.85179600  | 3.47793800  |
| C | 2.20476100 | -1.47450900 | -2.37017400 |
| C | 1.86971000 | -2.61054500 | -0.20261800 |
| C | 2.14859600 | -1.69390800 | 2.46414000  |
| C | 3.28747300 | -0.90011900 | -3.15552200 |
| C | 5.54996000 | 0.82361600  | -3.02659500 |
| C | 6.35180100 | 1.66512300  | -2.14257900 |

|   |             |             |             |
|---|-------------|-------------|-------------|
| C | 7.43618100  | 1.56141600  | 0.07817800  |
| C | 6.29873900  | 1.43635300  | 2.69502400  |
| C | 4.27913200  | -1.44093600 | 3.43356100  |
| C | 5.39289400  | -0.59860200 | 3.48743900  |
| C | 2.45499000  | -2.57144000 | -1.56029200 |
| C | 2.85024000  | -3.21796600 | 0.67496000  |
| C | 2.98006300  | -2.78326900 | 1.99777300  |
| C | 4.57678700  | -1.44585000 | -3.09913900 |
| C | 5.73326600  | -0.56518200 | -3.03276500 |
| C | 7.29631800  | 1.08315300  | -1.29439700 |
| C | 7.69799800  | 0.40539600  | 0.93115100  |
| C | 7.13992000  | 0.34319200  | 2.21197700  |
| C | 4.30454000  | -2.63171400 | 2.58806300  |
| C | 6.58054800  | -0.90897900 | 2.70247300  |
| C | 3.79397000  | -3.14167700 | -1.48675000 |
| C | 4.03678500  | -3.54835800 | -0.10837500 |
| C | 4.83670600  | -2.59560500 | -2.24496500 |
| C | 6.71707200  | -1.17082400 | -2.14034800 |
| C | 7.47869300  | -0.36574500 | -1.29021000 |
| C | 7.72361300  | -0.78229200 | 0.08823700  |
| C | 5.44276400  | -2.92937500 | 1.83308500  |
| C | 6.60480700  | -2.05247600 | 1.89048200  |
| C | 5.30538600  | -3.40344700 | 0.45731300  |
| C | 6.16009600  | -2.42925200 | -1.64915600 |
| C | 7.19063100  | -1.98675400 | 0.55845400  |
| C | 6.39086500  | -2.82644900 | -0.33110000 |
| H | -5.94700500 | -1.09882400 | -1.74235800 |



|   |             |             |             |
|---|-------------|-------------|-------------|
| H | -3.50178600 | -1.05138300 | -1.87439300 |
| H | -3.35373700 | 0.98900900  | 1.92879700  |
| H | -5.80648500 | 0.97761700  | 2.01723600  |
| H | -1.32413000 | 1.48409800  | 1.40816400  |
| H | -1.24907400 | -0.37471500 | -2.04631900 |
| H | -2.67828900 | 4.71275000  | -1.08229900 |
| H | -0.94413800 | 4.85792400  | -1.42503700 |
| H | -1.76763400 | 6.89836900  | -0.16253500 |
| H | -0.59615900 | 5.98771900  | 0.81358600  |
| H | -2.33278700 | 5.84853800  | 1.15336500  |
| H | -2.29967300 | -4.50443500 | -2.21930700 |
| H | -0.66091800 | -4.74825300 | -1.58819700 |
| H | -0.85749600 | -5.69425400 | -3.93539900 |
| H | 0.29088500  | -4.33897700 | -3.89589900 |
| H | -1.34807800 | -4.09455800 | -4.53085200 |
| C | -6.06135800 | -0.06558800 | 0.14602400  |

E = -4021.94626431 a.u.

### **C<sub>60</sub>-B2**

0 1

The number of imaginary frequency = 0

|   |              |             |             |
|---|--------------|-------------|-------------|
| C | -7.98763200  | -0.07249100 | 0.05919900  |
| C | -8.74067400  | -0.68289300 | -0.96979900 |
| C | -10.13471400 | -0.67564400 | -0.93249600 |
| C | -10.82209000 | -0.06156200 | 0.12904100  |
| C | -10.07855000 | 0.54584300  | 1.15604900  |
| C | -8.68448000  | 0.54226200  | 1.12467200  |
| C | -12.31779800 | -0.05328400 | 0.16592600  |
| C | -13.02125500 | 0.99756500  | -0.44732000 |

|   |              |             |             |
|---|--------------|-------------|-------------|
| N | -14.43399000 | 1.02217900  | -0.42094700 |
| B | -15.33655100 | -0.03195700 | 0.24655900  |
| N | -14.41467900 | -1.09961000 | 0.86403400  |
| C | -13.00216200 | -1.09487500 | 0.81501500  |
| C | -14.83128800 | -2.20121100 | 1.54394300  |
| C | -13.69377300 | -2.93598000 | 1.94949600  |
| C | -12.54645600 | -2.27066000 | 1.50956700  |
| C | -12.58663600 | 2.16711400  | -1.16523600 |
| C | -13.74633100 | 2.84872200  | -1.54383100 |
| C | -14.87080200 | 2.12991700  | -1.07789400 |
| F | -16.21144200 | -0.62989500 | -0.72733600 |
| F | -16.14777000 | 0.57904600  | 1.26656000  |
| C | -11.14368600 | -2.74651600 | 1.74945600  |
| C | -16.27312500 | -2.50380400 | 1.77831600  |
| C | -11.19195300 | 2.62306900  | -1.47930200 |
| C | -16.31879500 | 2.45283700  | -1.23431300 |
| H | -8.22061100  | -1.15935400 | -1.79352400 |
| H | -10.69842400 | -1.14847200 | -1.73050100 |
| H | -10.59867600 | 1.02254300  | 1.98090200  |
| H | -8.12082900  | 1.01418400  | 1.92192200  |
| H | -13.71777500 | -3.85962800 | 2.50853400  |
| H | -13.78706100 | 3.77292000  | -2.10101700 |
| H | -11.16125000 | -3.68705300 | 2.30847300  |
| H | -10.55407700 | -2.02417600 | 2.32462800  |
| H | -10.59924800 | -2.92077000 | 0.81479500  |
| H | -16.38598800 | -3.43859900 | 2.33213700  |
| H | -16.80925200 | -2.57940000 | 0.82613300  |

|   |              |             |             |
|---|--------------|-------------|-------------|
| H | -16.74942100 | -1.69173000 | 2.33867300  |
| H | -10.64386200 | 1.89211600  | -2.08386700 |
| H | -10.59670600 | 2.78949800  | -0.57464400 |
| H | -11.22580200 | 3.56357700  | -2.03763800 |
| H | -16.44822800 | 3.39133200  | -1.77815200 |
| H | -16.80222000 | 2.53145300  | -0.25458700 |
| H | -16.83529600 | 1.64953200  | -1.77122300 |
| C | -3.20977600  | -0.67193100 | -1.09701800 |
| C | -1.81889800  | -0.65617700 | -1.13478100 |
| C | -1.07640300  | -0.04241100 | -0.10545900 |
| C | -1.78168200  | 0.56803400  | 0.95404100  |
| C | -3.17087400  | 0.55767800  | 0.98506100  |
| N | 0.33729900   | -0.02172800 | -0.11666100 |
| C | 1.04272500   | 1.19969300  | 0.26654100  |
| C | 1.10561300   | -0.77911000 | -1.10106800 |
| C | 0.71120300   | 2.35075100  | -0.68962400 |
| O | 0.70540900   | 3.54934400  | -0.03765100 |
| C | 0.46251500   | 4.77186900  | -0.85016000 |
| C | 0.50171800   | 5.94682100  | 0.10705800  |
| C | 0.78314400   | -2.26822800 | -1.05948700 |
| O | 1.08058400   | -2.83132100 | -2.27451300 |
| C | 0.91775000   | -4.30308900 | -2.40339000 |
| C | 1.39761200   | -4.67390100 | -3.79319300 |
| O | 0.48622600   | 2.21924700  | -1.89762600 |
| O | 0.35804600   | -2.90480000 | -0.09603500 |
| C | 4.23059100   | 2.80645800  | 0.58471000  |
| C | 3.44231700   | 1.94846200  | -0.31064500 |

|   |            |             |             |
|---|------------|-------------|-------------|
| C | 5.33492500 | 3.36451500  | -0.18404200 |
| C | 4.42467500 | 2.44984500  | 1.90273400  |
| C | 2.57462700 | 0.82876200  | 0.20567400  |
| C | 4.03910800 | 1.93958200  | -1.55724000 |
| C | 5.23056500 | 2.82594500  | -1.52606600 |
| C | 6.58706800 | 3.53986700  | 0.40386400  |
| C | 3.84491200 | 1.18178500  | 2.40495100  |
| C | 5.73097700 | 2.62130500  | 2.52280600  |
| C | 2.62004300 | -0.53179000 | -0.70492400 |
| C | 3.10409000 | 0.36864900  | 1.57378900  |
| C | 4.08452300 | 0.73835000  | -2.35657700 |
| C | 6.37098500 | 2.49758700  | -2.22868200 |
| C | 7.78971200 | 3.19357400  | -0.33812600 |
| C | 6.78996300 | 3.16136100  | 1.79505500  |
| C | 4.80227700 | 0.60575400  | 3.32860900  |
| C | 5.96297600 | 1.48829300  | 3.41015900  |
| C | 3.53155100 | -0.44350400 | -1.90081600 |
| C | 3.17159500 | -1.58679400 | 0.27586000  |
| C | 3.29438300 | -1.05384700 | 1.60304400  |
| C | 5.32258700 | 0.43132300  | -3.11624800 |
| C | 6.41838400 | 1.26612800  | -3.04701500 |
| C | 7.68251000 | 2.68699100  | -1.63304500 |
| C | 8.74641100 | 2.60406000  | 0.59396900  |
| C | 8.12550600 | 2.58109400  | 1.91694500  |
| C | 4.96580000 | -0.77447300 | 3.40450600  |
| C | 7.23604000 | 0.94602700  | 3.53633600  |
| C | 4.39860100 | -1.55659900 | -2.31369100 |

|   |            |             |             |
|---|------------|-------------|-------------|
| C | 3.99409000 | -2.61942100 | -0.12098400 |
| C | 4.19863100 | -1.62566500 | 2.51853800  |
| C | 5.50316700 | -1.00663400 | -3.08744700 |
| C | 7.75824100 | 0.71467400  | -2.94100600 |
| C | 8.53606700 | 1.58197600  | -2.06068500 |
| C | 9.55212600 | 1.54804700  | 0.18705000  |
| C | 8.34421200 | 1.50525200  | 2.76700200  |
| C | 6.30296600 | -1.34151000 | 3.53578200  |
| C | 7.41122200 | -0.50355000 | 3.59502300  |
| C | 4.62020400 | -2.61973300 | -1.46331400 |
| C | 4.94924500 | -3.19747000 | 0.80094100  |
| C | 5.04022800 | -2.73036800 | 2.10975900  |
| C | 6.78294800 | -1.54879400 | -2.97445500 |
| C | 7.93821700 | -0.66703700 | -2.90024200 |
| C | 9.45112700 | 1.02840600  | -1.17374100 |
| C | 9.78745000 | 0.41837000  | 1.08215400  |
| C | 9.19628600 | 0.39627700  | 2.34164700  |
| C | 6.34955300 | -2.55816000 | 2.72835900  |
| C | 8.61972400 | -0.83907100 | 2.85406500  |
| C | 5.95500600 | -3.18940800 | -1.33450100 |
| C | 6.15729000 | -3.55364700 | 0.06231800  |
| C | 7.01460700 | -2.67101500 | -2.07636200 |
| C | 8.89497900 | -1.24601100 | -1.96201200 |
| C | 9.62994400 | -0.42034800 | -1.11994900 |
| C | 9.83422600 | -0.79450300 | 0.27738200  |
| C | 7.50249300 | -2.87777900 | 2.01934100  |
| C | 8.66380100 | -2.00085200 | 2.08231500  |

|   |             |             |             |
|---|-------------|-------------|-------------|
| C | 7.40315200  | -3.39360100 | 0.65539300  |
| C | 8.32100400  | -2.48821900 | -1.44839400 |
| C | 9.28736300  | -1.97664900 | 0.76640200  |
| C | 8.51181400  | -2.84267300 | -0.11944200 |
| H | -3.76194800 | -1.14706600 | -1.90050900 |
| H | -1.31558700 | -1.10668000 | -1.98139900 |
| H | -1.24092100 | 1.03061100  | 1.77115500  |
| H | -3.69304500 | 1.02546700  | 1.81262400  |
| H | 0.79103200  | 1.51448000  | 1.27941400  |
| H | 0.95361400  | -0.41530900 | -2.12495300 |
| H | -0.50520800 | 4.65781400  | -1.34653300 |
| H | 1.23981800  | 4.82290900  | -1.61810900 |
| H | 0.33273400  | 6.87937900  | -0.44287700 |
| H | 1.47355100  | 6.01100600  | 0.60547400  |
| H | -0.27416100 | 5.85265400  | 0.87269400  |
| H | -0.13784200 | -4.53953600 | -2.24034600 |
| H | 1.50177500  | -4.77905200 | -1.61069000 |
| H | 1.29730700  | -5.75442100 | -3.94514200 |
| H | 2.44877200  | -4.40138900 | -3.92588200 |
| H | 0.80884600  | -4.16116100 | -4.55969400 |
| C | -3.91986200 | -0.06416800 | -0.03941900 |
| C | -5.34294200 | -0.07219200 | -0.00651800 |
| C | -6.56387700 | -0.07429200 | 0.02334900  |

E = -4329.09008535 a.u.

## 6. High resolution mass spectra

D:\data\gc\20200927\Zhu-1\0\_D21\2\1Ref

Comment 1

Comment 2

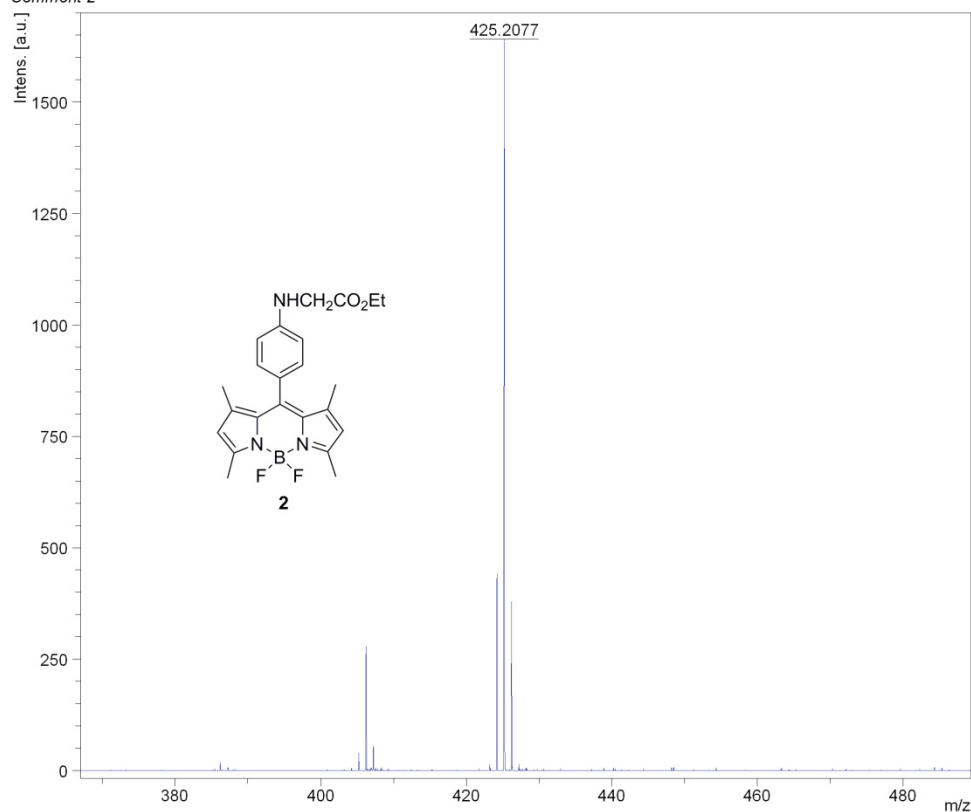

### Acquisition Parameter

|                                       |                                                     |
|---------------------------------------|-----------------------------------------------------|
| Date of acquisition                   | 2020-09-29T10:29:53.796+08:00                       |
| Acquisition method name               | D:\Methods\flexControlMethods\gc-RP_100-1500_Da.par |
| Acquisition operation mode            | Reflector                                           |
| Voltage polarity                      | POS                                                 |
| Number of shots                       | 500                                                 |
| Name of spectrum used for calibration | sample                                              |
| Calibration reference list used       | sample                                              |

### Instrument Info

|                 |                  |
|-----------------|------------------|
| User            | BDAL@CN          |
| Instrument      | FLEX-PC          |
| Instrument type | ultraflexTOF/TOF |

Bruker Daltonics flexAnalysis

printed: 2020-9-29 11:01:56

Figure S6. Expansion of the high resolution mass spectrum of 2.

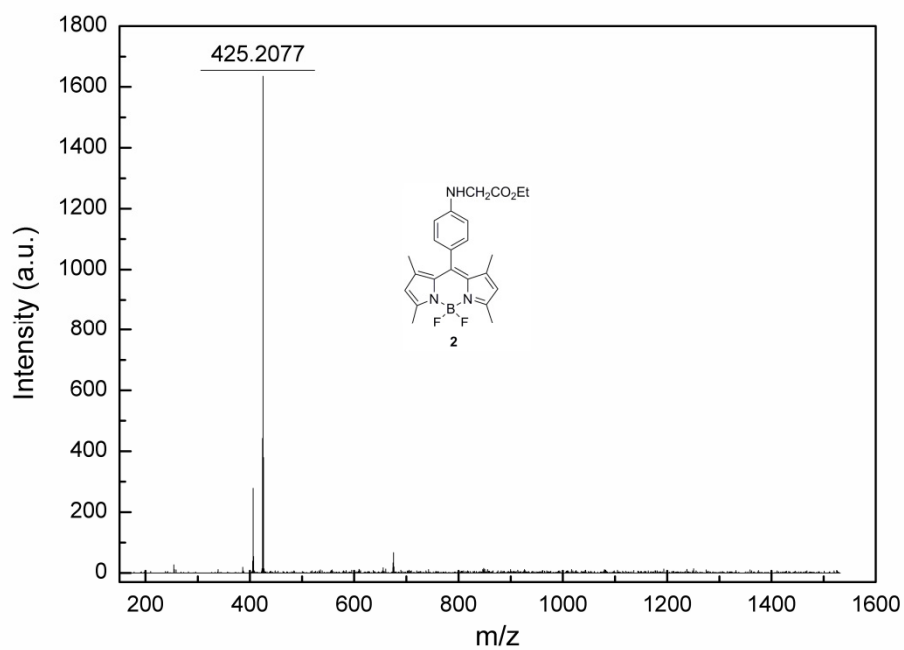

**Figure S7.** The high resolution mass spectrum of **2**.



Comment 1

Comment 2

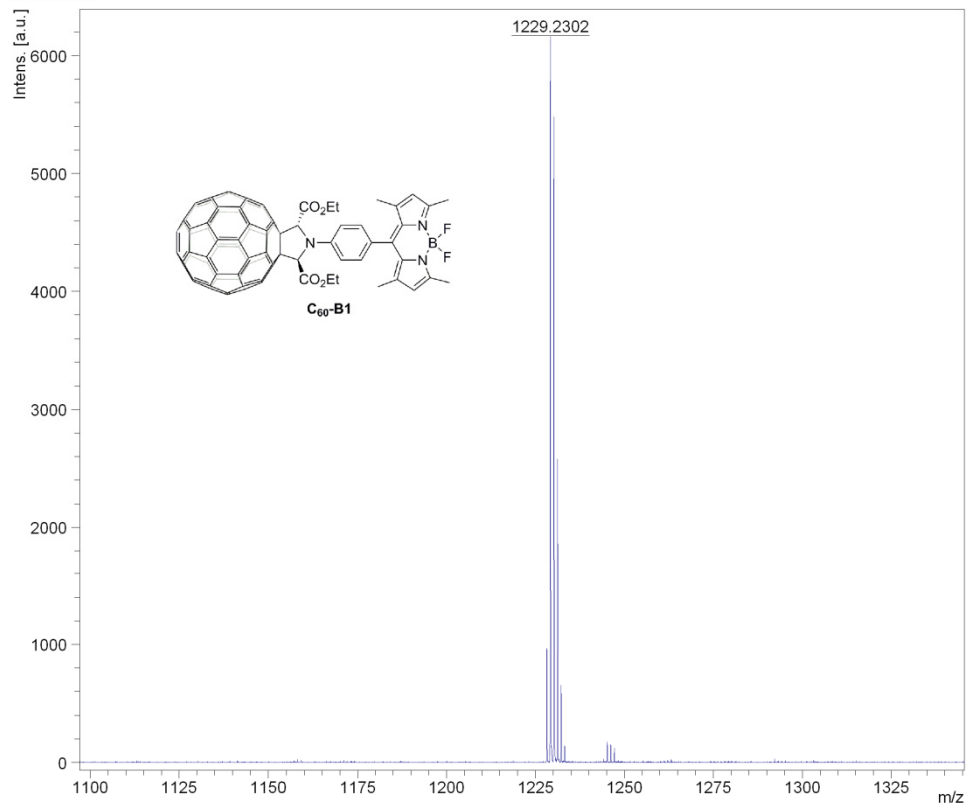

**Acquisition Parameter**

Date of acquisition 2020-07-28T10:17:49.937+08:00  
Acquisition method name D:\Methods\flexControl\Methods\gc-RN\_0-1200\_Da.par  
Acquisition operation mode Reflector  
Voltage polarity NEG  
Number of shots 500  
Name of spectrum used for calibration sample  
Calibration reference list used sample

**Instrument Info**

User BDAL@CN  
Instrument FLEX-PC  
Instrument type ultraflexTOF/TOF

**Figure S8.** Expansion of the high resolution mass spectrum of C<sub>60</sub>-B1.

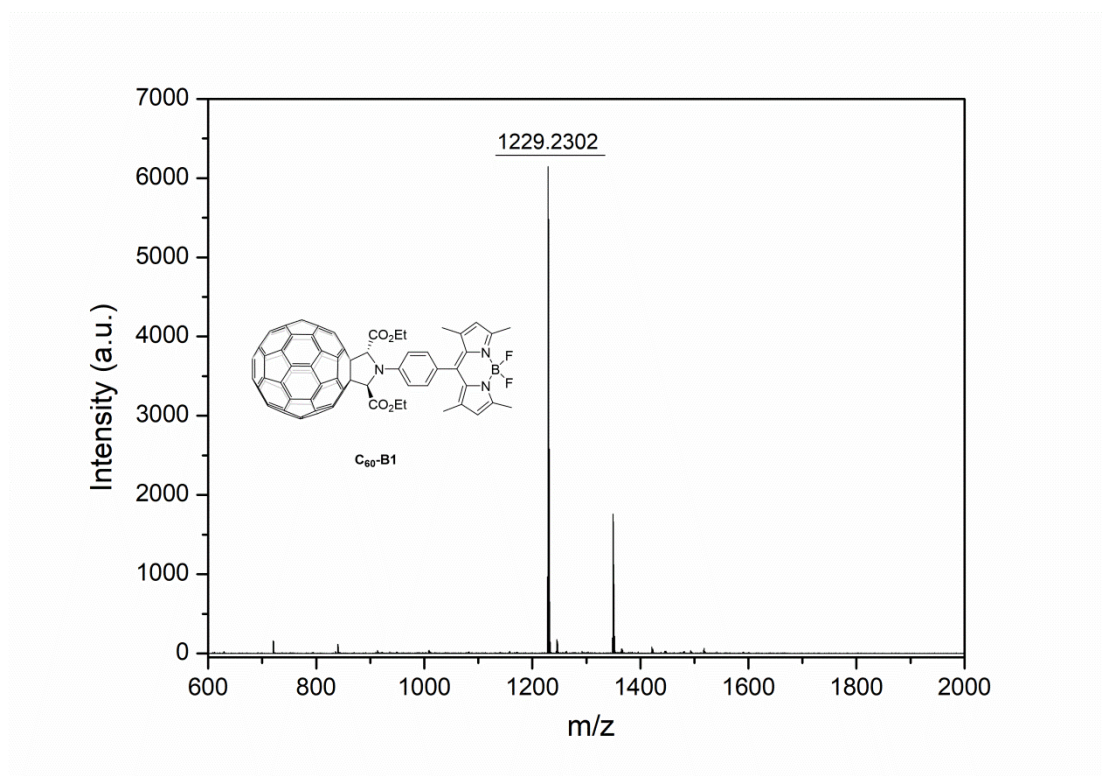

**Figure S9.** The high resolution mass spectrum of **C<sub>60</sub>-B1**.

Comment 1

Comment 2

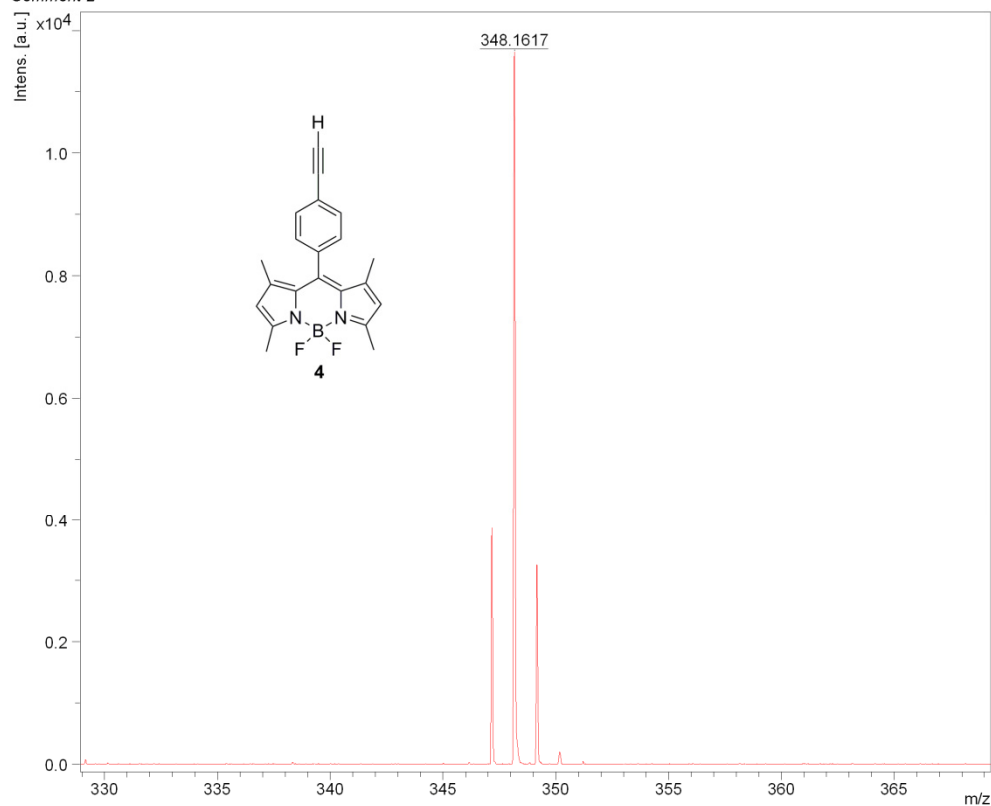

**Acquisition Parameter**

Date of acquisition 2018-04-09T15:45:57.167+08:00  
Acquisition method name D:\Methods\flexControlMethods\gc-RP\_100-1500\_Da.par  
Acquisition operation mode Reflector  
Voltage polarity POS  
Number of shots 500  
Name of spectrum used for calibration  
Calibration reference list used sample

**Instrument Info**

Bruker Daltonics flexAnalysis

printed: 4/11/2018 2:40:43 PM

**Figure S10.** Expansion of the high resolution mass spectrum of **4**.

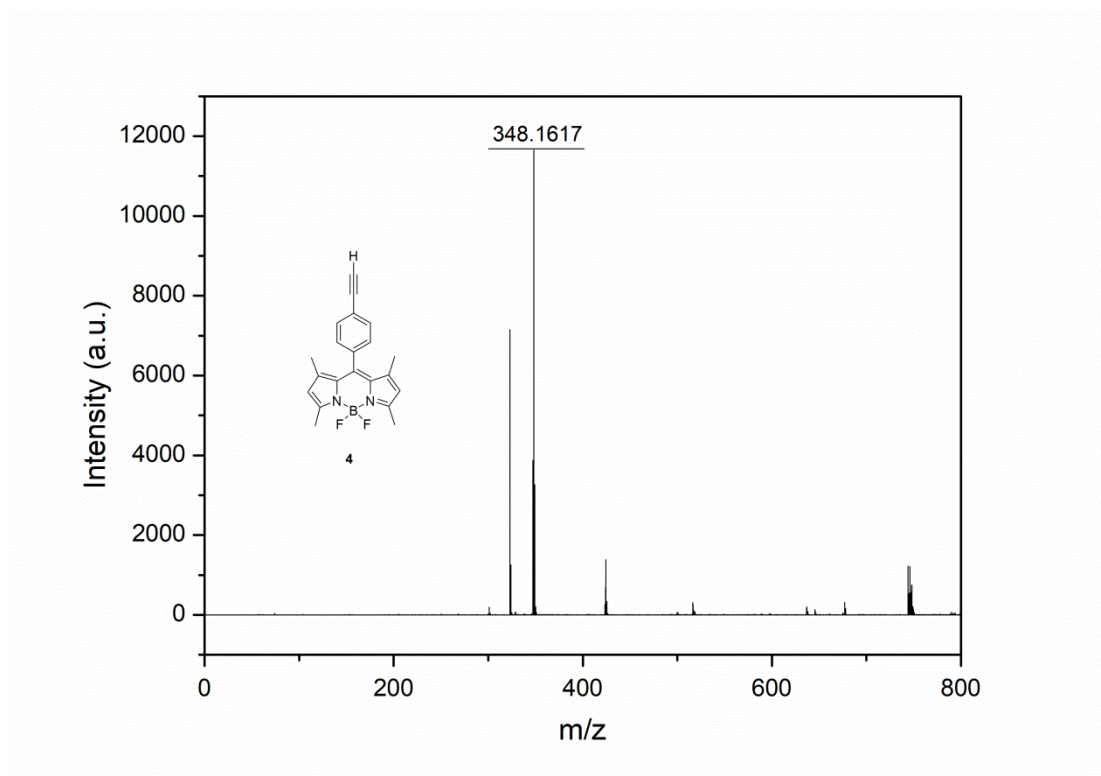

**Figure S11.** The high resolution mass spectrum of **4**.

Comment 1

Comment 2

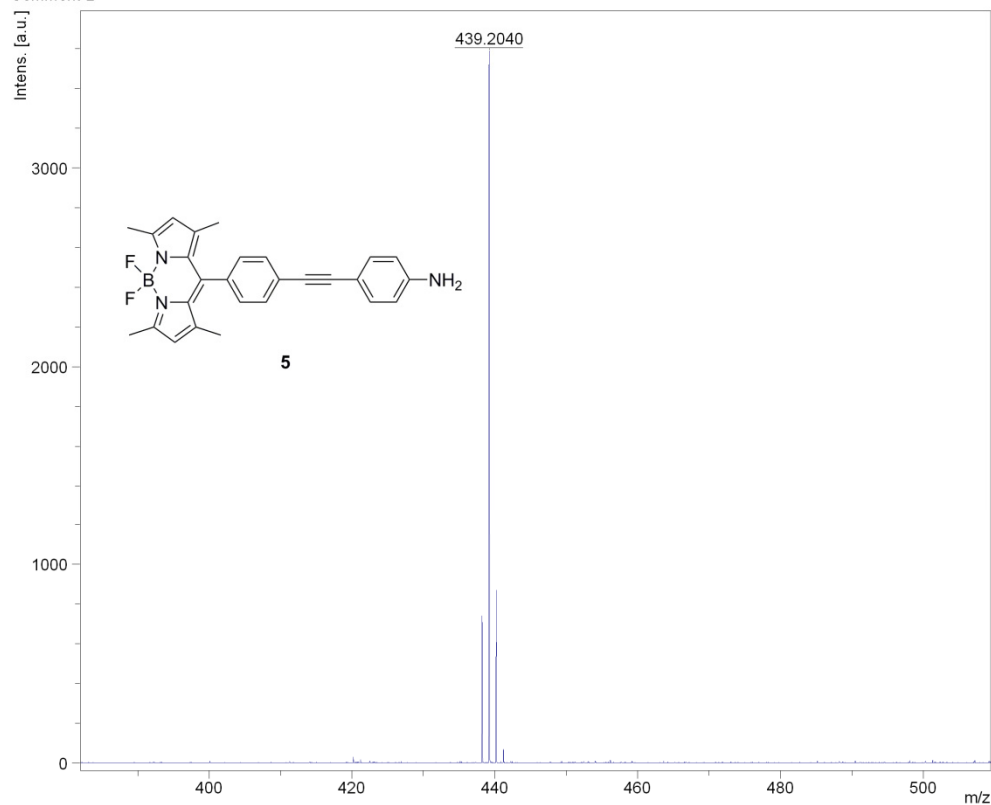

**Acquisition Parameter**

Date of acquisition 2018-04-09T15:45:43.759+08:00  
Acquisition method name D:\Methods\flexControlMethods\gc-RP\_100-1500\_Da.par  
Acquisition operation mode Reflector  
Voltage polarity POS  
Number of shots 500  
Name of spectrum used for calibration  
Calibration reference list used sample

**Instrument Info**

Bruker Daltonics flexAnalysis

printed: 4/11/2018 2:40:10 PM

**Figure S12.** Expansion of the high resolution mass spectrum of **5**.

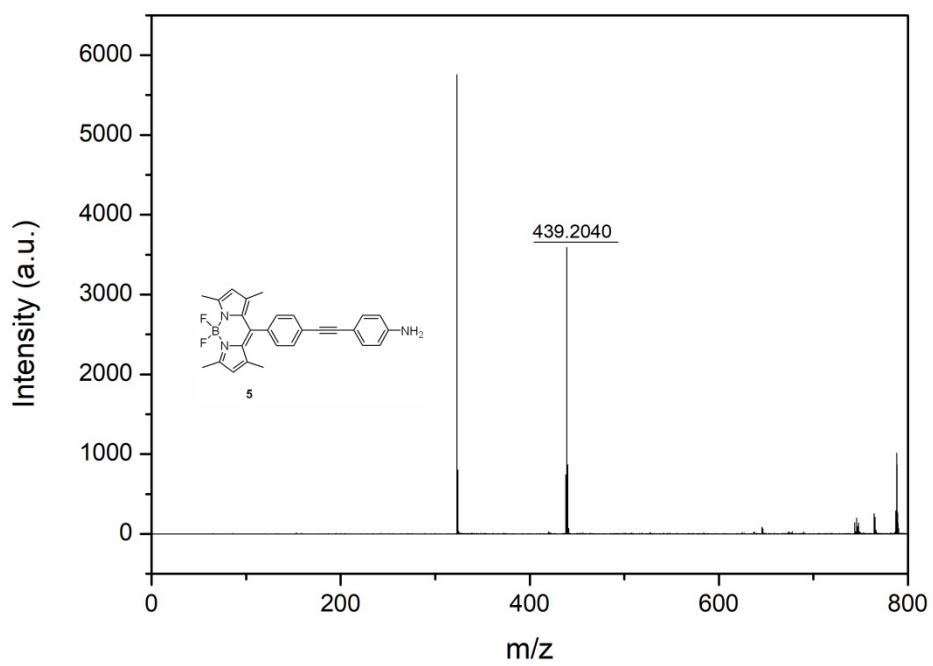

**Figure S13.** The high resolution mass spectrum of **5**.

Comment 1

Comment 2

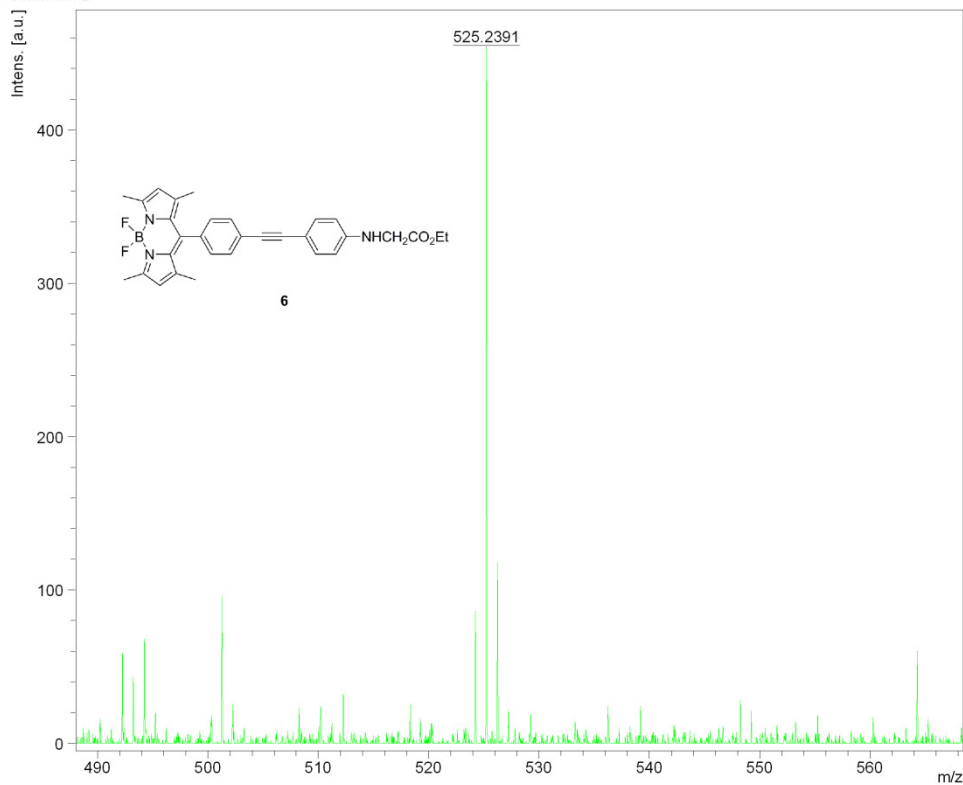

**Acquisition Parameter**

Date of acquisition 2018-04-09T15:46:07.433+08:00  
Acquisition method name D:\Methods\flexControlMethods\gc-RP\_100-1500\_Da.par  
Acquisition operation mode Reflector  
Voltage polarity POS  
Number of shots 500  
Name of spectrum used for calibration  
Calibration reference list used sample

**Instrument Info**

Bruker Daltonics flexAnalysis

printed: 4/11/2018 2:41:11 PM

**Figure S14.** Expansion of the high resolution mass spectrum of **6**.

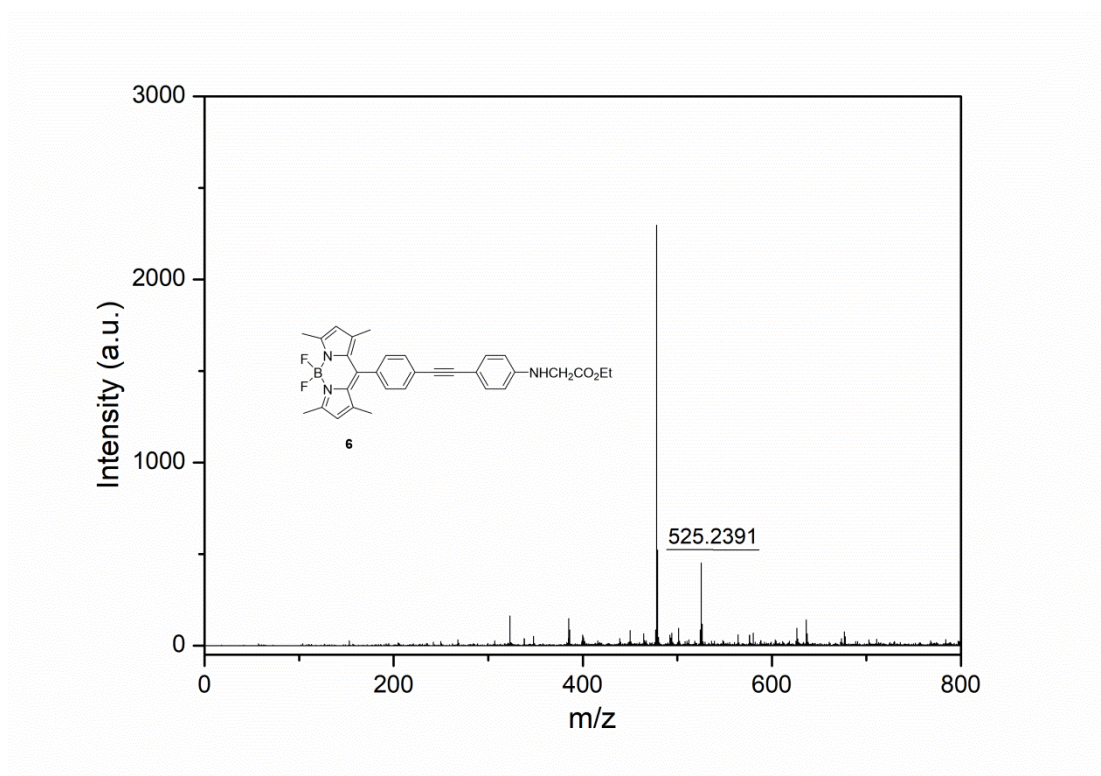

**Figure S15.** The high resolution mass spectrum of **6**.



Comment 1

Comment 2

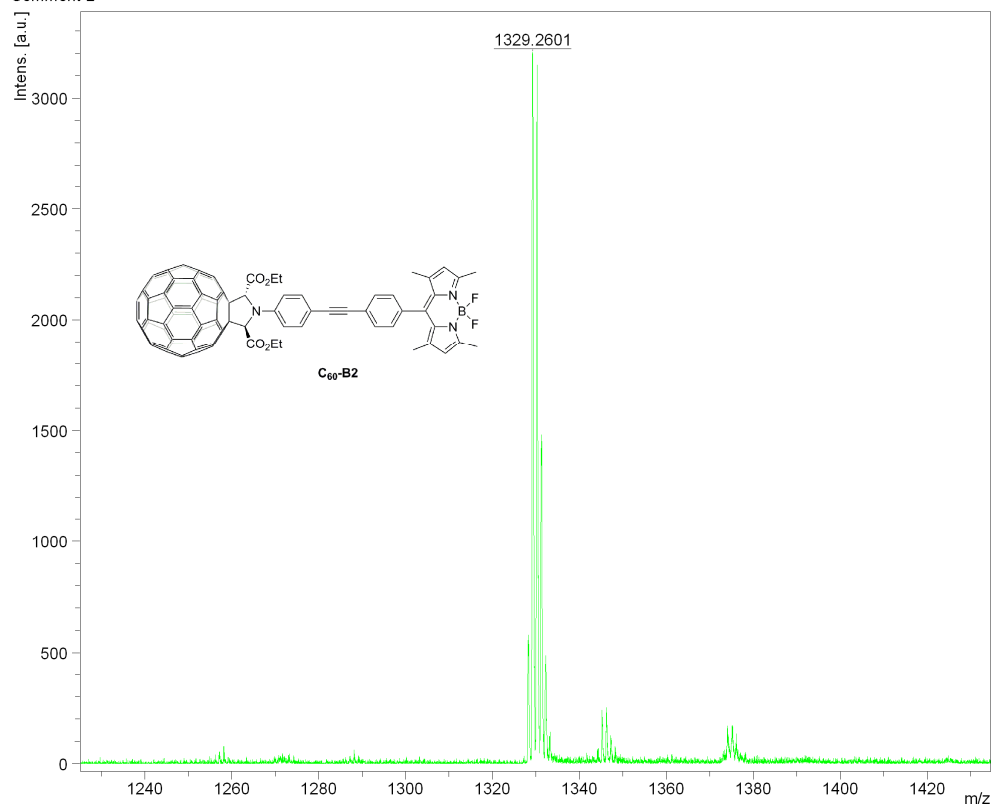**Acquisition Parameter**

|                                       |                                                   |
|---------------------------------------|---------------------------------------------------|
| Date of acquisition                   | 2018-01-31T17:06:17.794+08:00                     |
| Acquisition method name               | D:\Methods\flexControlMethods\gc-RN_0-1200_Da.par |
| Acquisition operation mode            | Reflector                                         |
| Voltage polarity                      | NEG                                               |
| Number of shots                       | 500                                               |
| Name of spectrum used for calibration |                                                   |
| Calibration reference list used       | sample                                            |

**Instrument Info**

Bruker Daltonics flexAnalysis

printed: 1/31/2018 5:34:05 PM

**Figure S16.** Expansion of the high resolution mass spectrum of **C<sub>60</sub>-B2**.

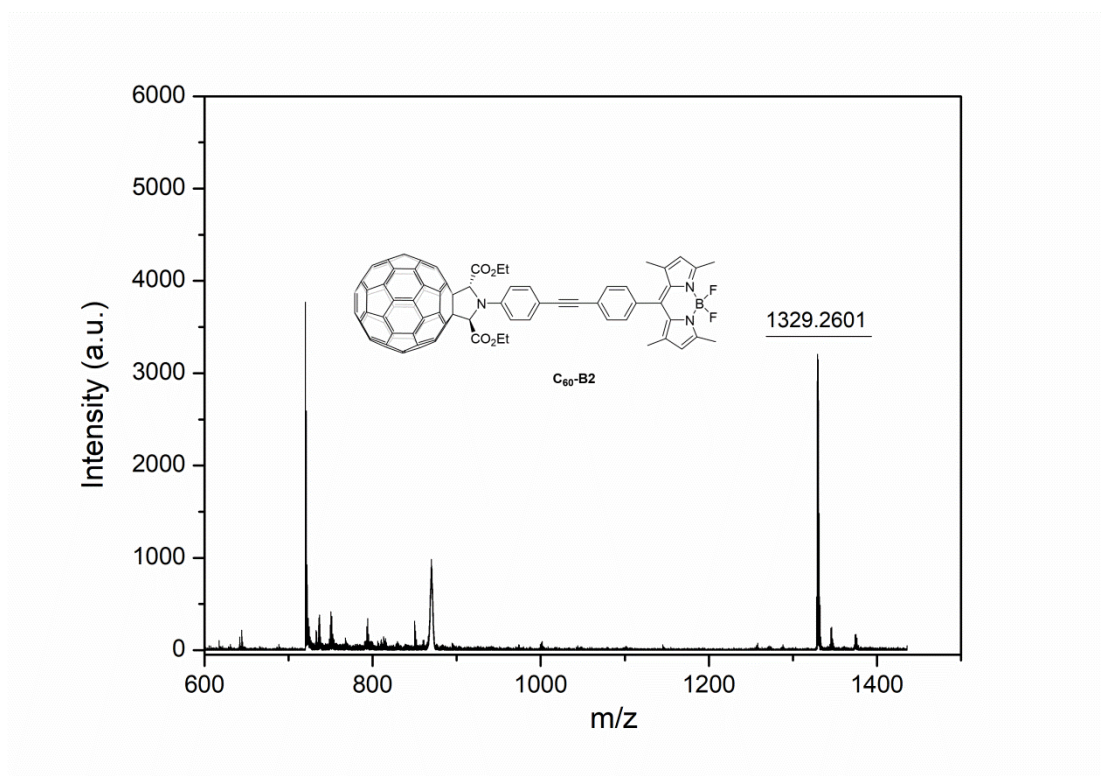

## 7. <sup>1</sup>H NMR, <sup>19</sup>F NMR and <sup>13</sup>C NMR spectra

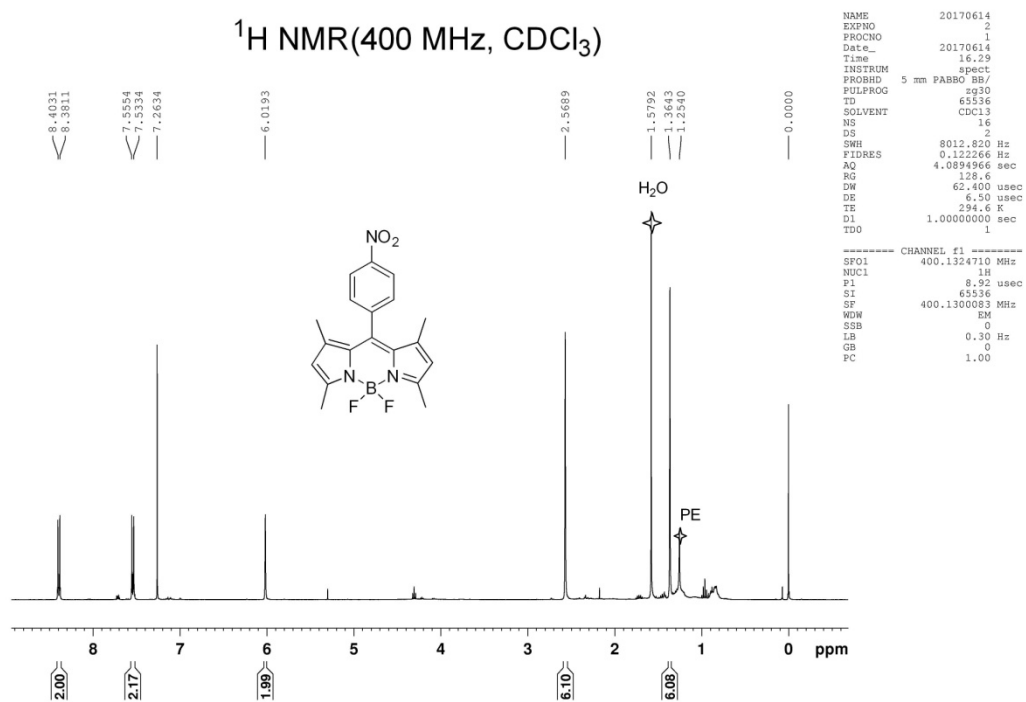

Figure S18. <sup>1</sup>H NMR of **1** in CDCl<sub>3</sub> (400 MHz).

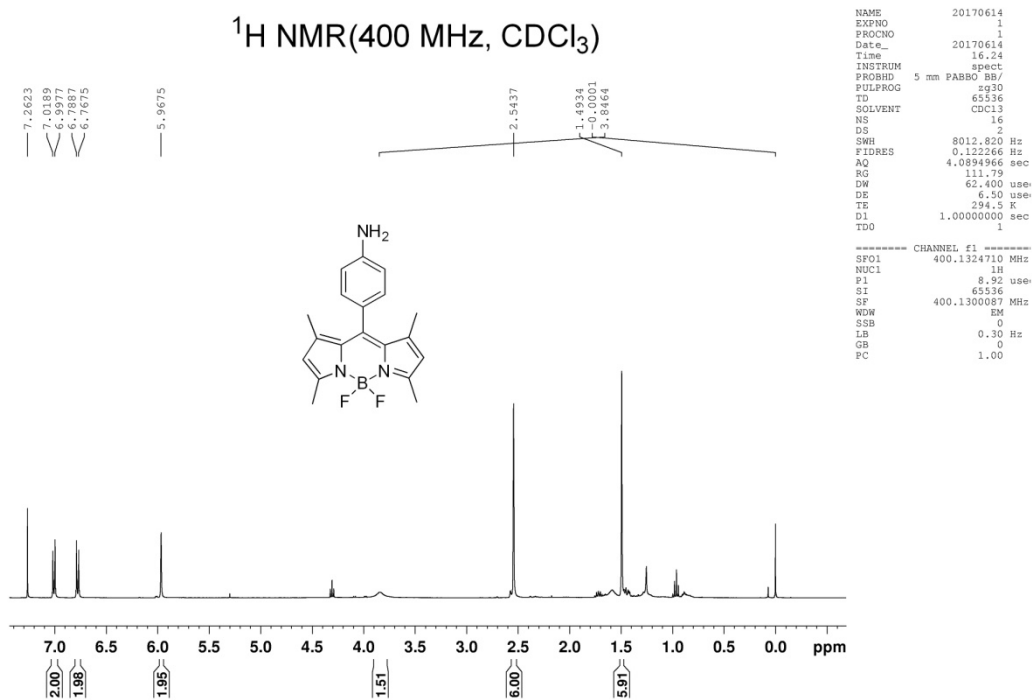

**Figure S19.** <sup>1</sup>H NMR of **R1** in CDCl<sub>3</sub> (400 MHz).

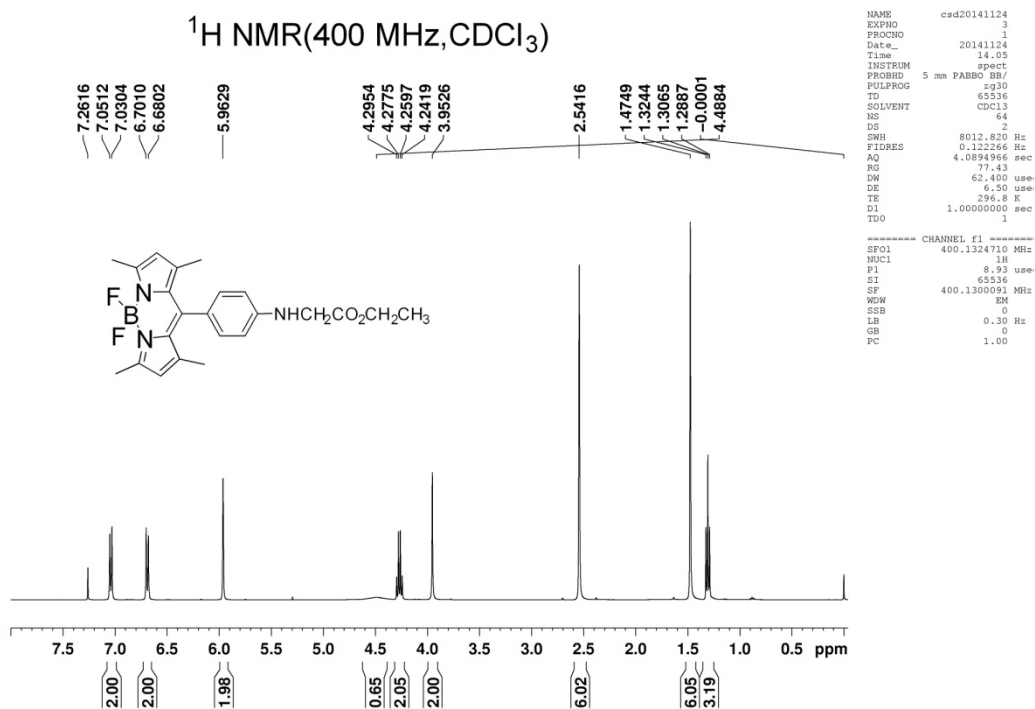

**Figure S20.** <sup>1</sup>H NMR of **2** in CDCl<sub>3</sub> (400 MHz).

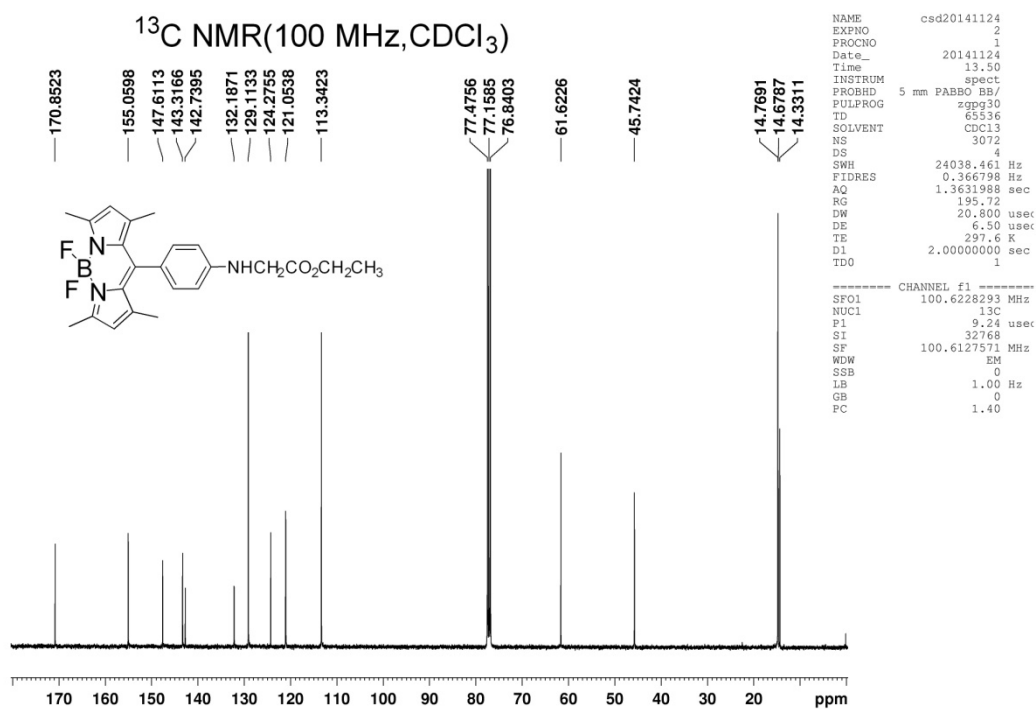

Figure S21. <sup>13</sup>C NMR of **2** in CDCl<sub>3</sub> (100 MHz).

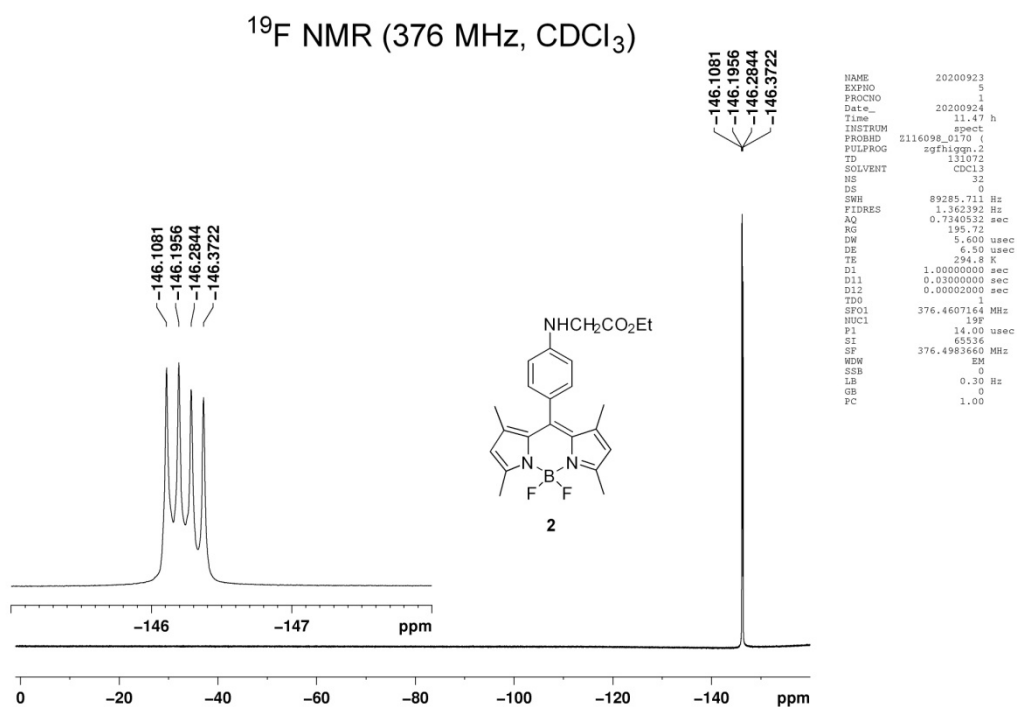

Figure S22. <sup>19</sup>F NMR of **2** in CDCl<sub>3</sub> (376 MHz).

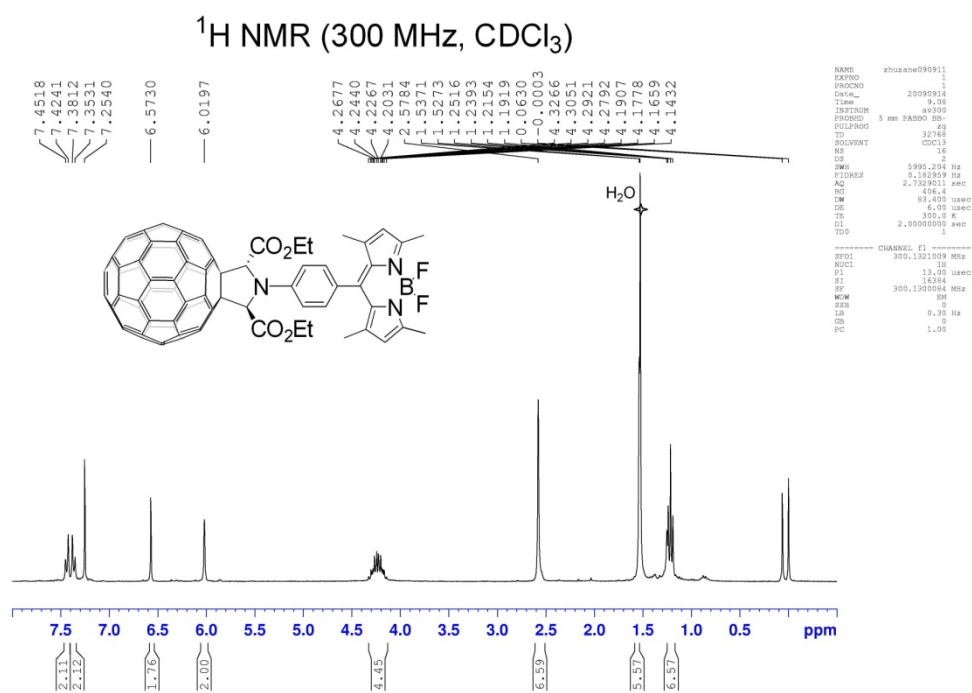

**Figure S23.** <sup>1</sup>H NMR of C<sub>60</sub>-B1 in CDCl<sub>3</sub> (300 MHz).

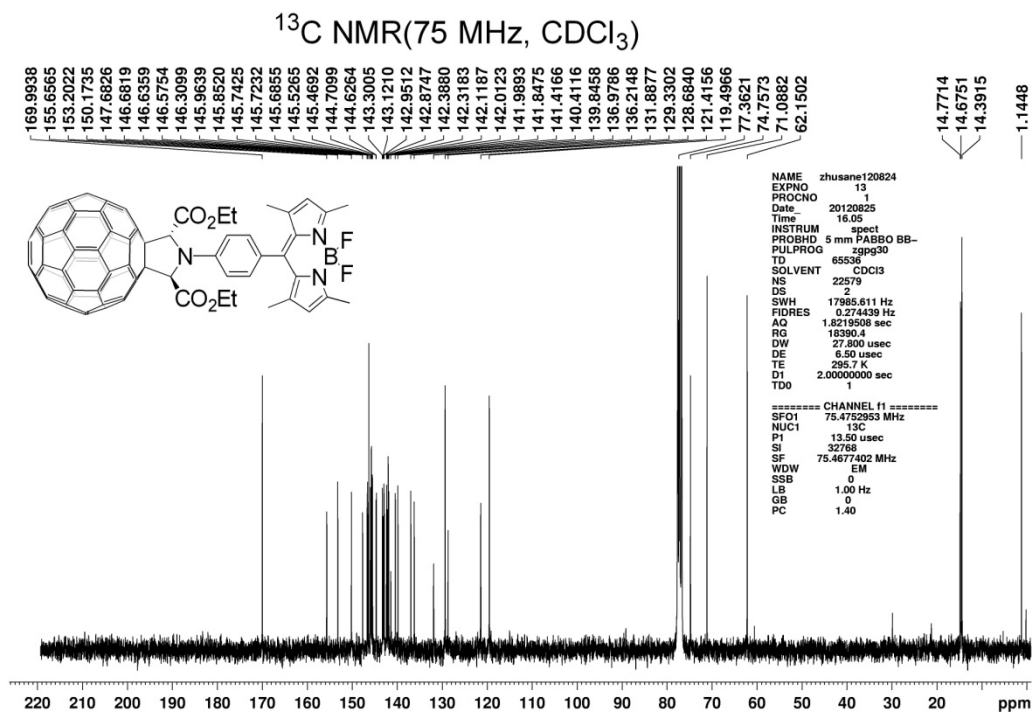

**Figure S24.** <sup>13</sup>C NMR of C<sub>60</sub>-B1 in CDCl<sub>3</sub> (75 MHz).

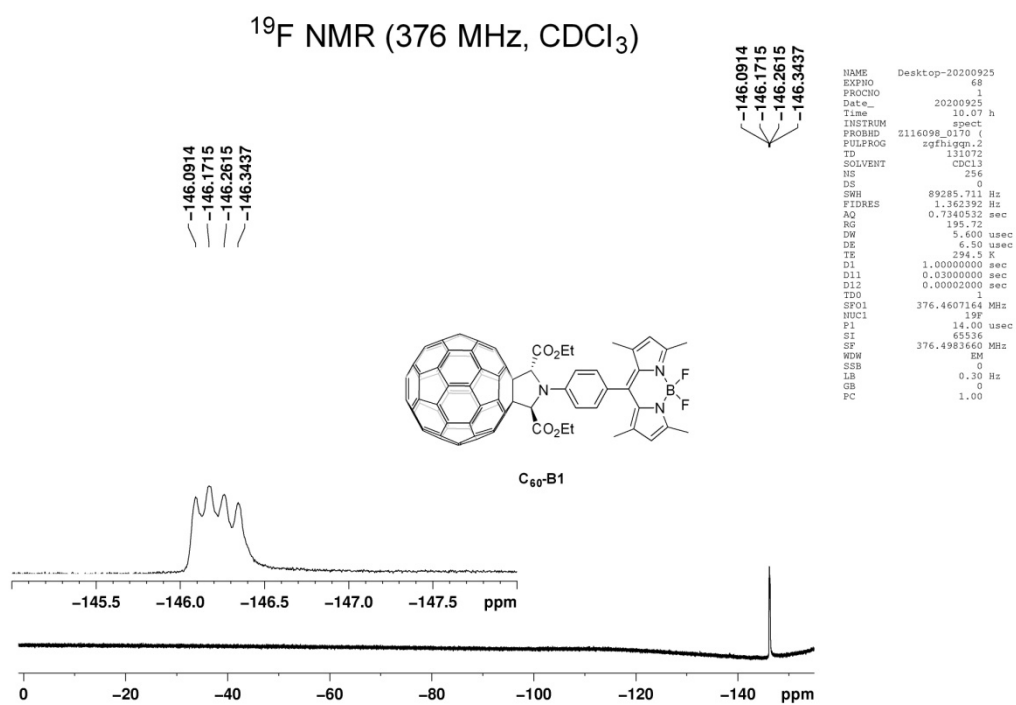

**Figure S25.**  $^{19}\text{F}$  NMR of **C<sub>60</sub>-B1** in  $\text{CDCl}_3$  (376 MHz).

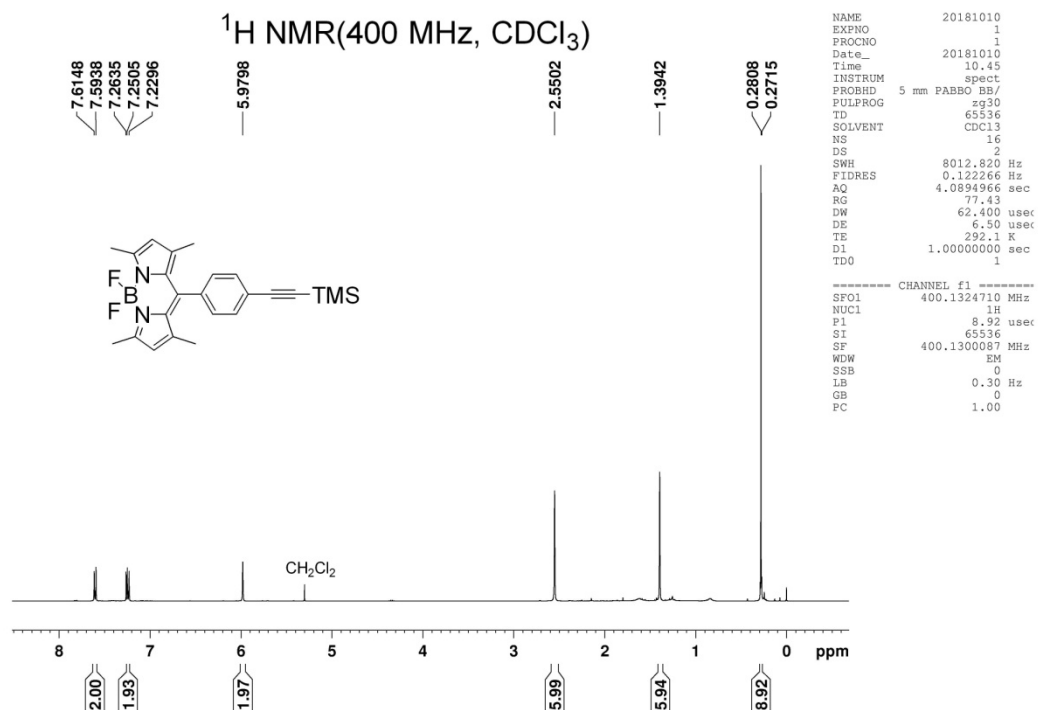

**Figure S26.**  $^1\text{H}$  NMR of **3** in  $\text{CDCl}_3$  (400 MHz).

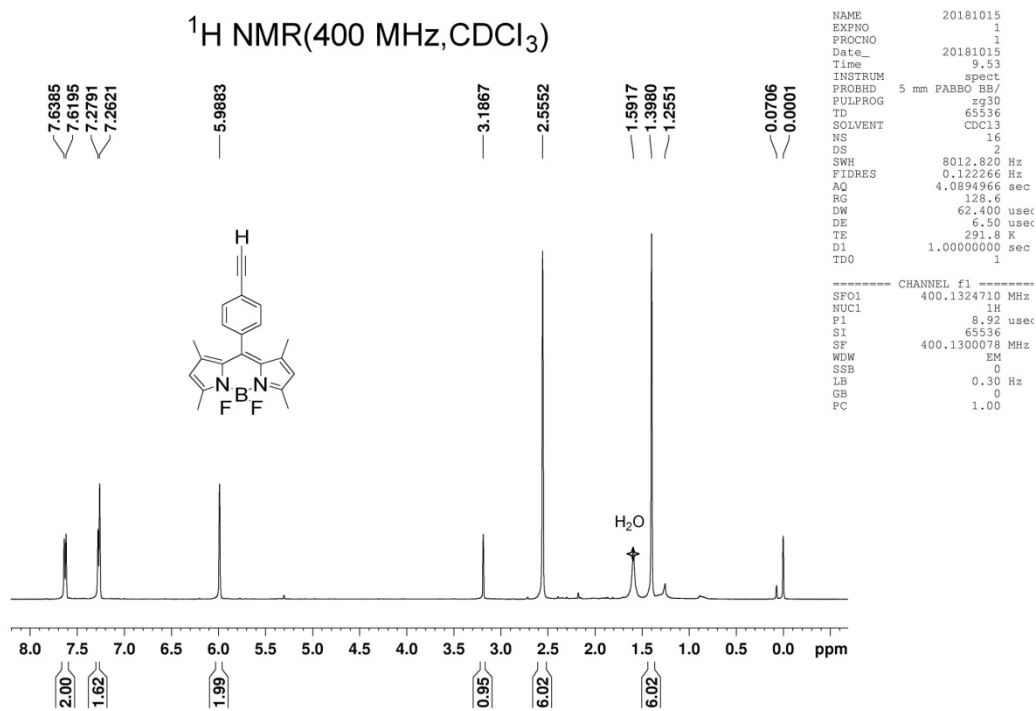

Figure S27. <sup>1</sup>H NMR of **4** in CDCl<sub>3</sub> (400 MHz).

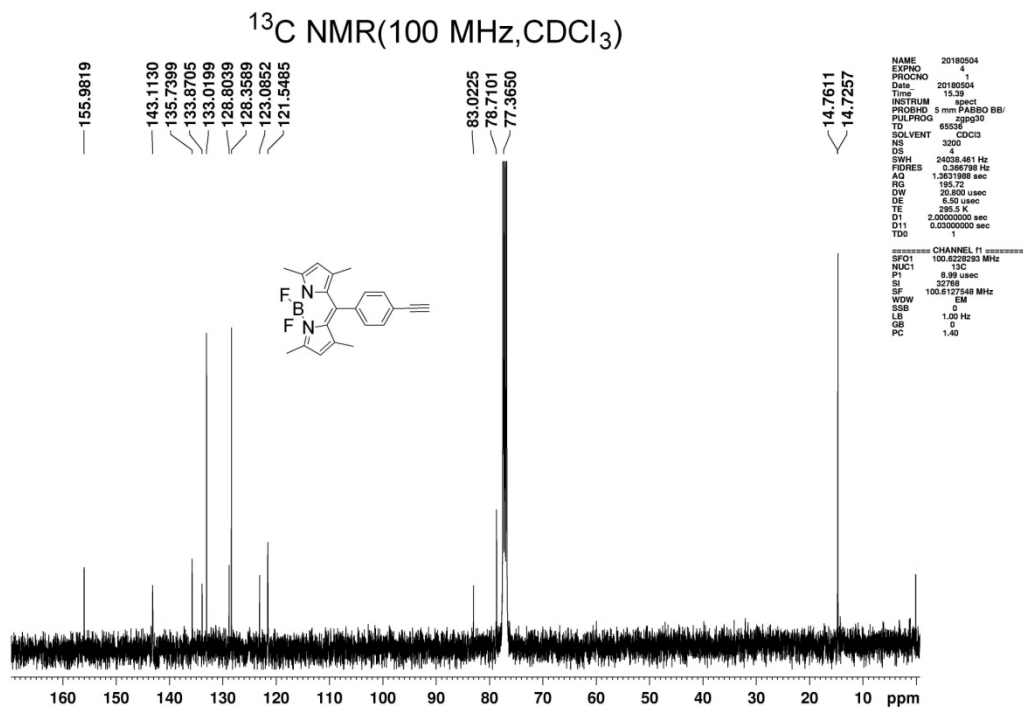

Figure S28. <sup>13</sup>C NMR of **4** in CDCl<sub>3</sub> (100 MHz).

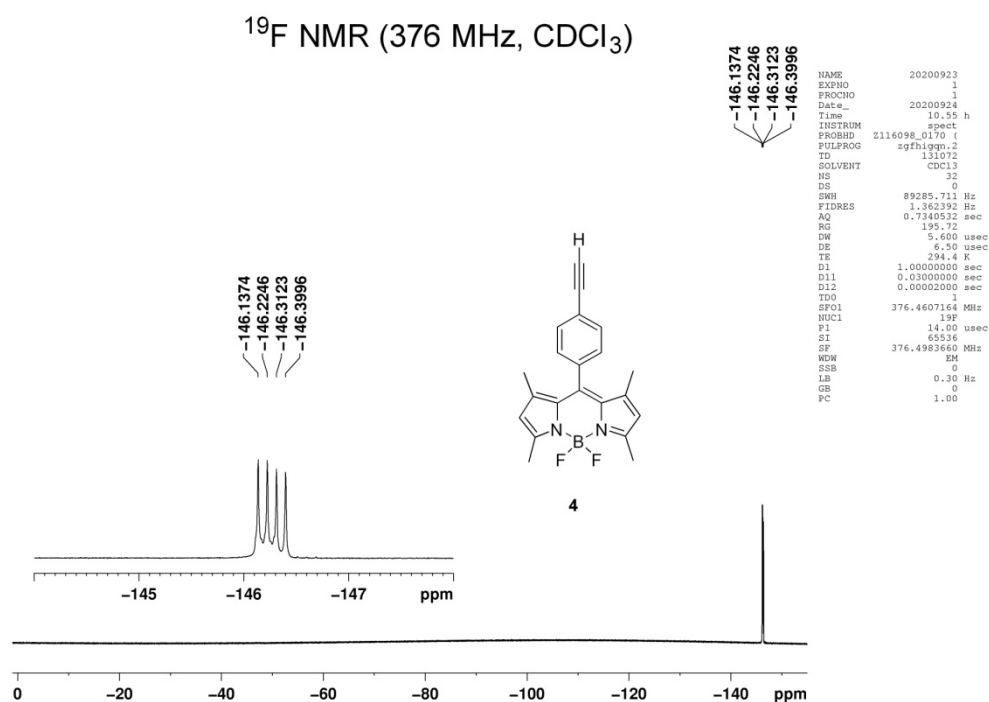

**Figure S29.** <sup>19</sup>F NMR of **4** in CDCl<sub>3</sub> (376 MHz).

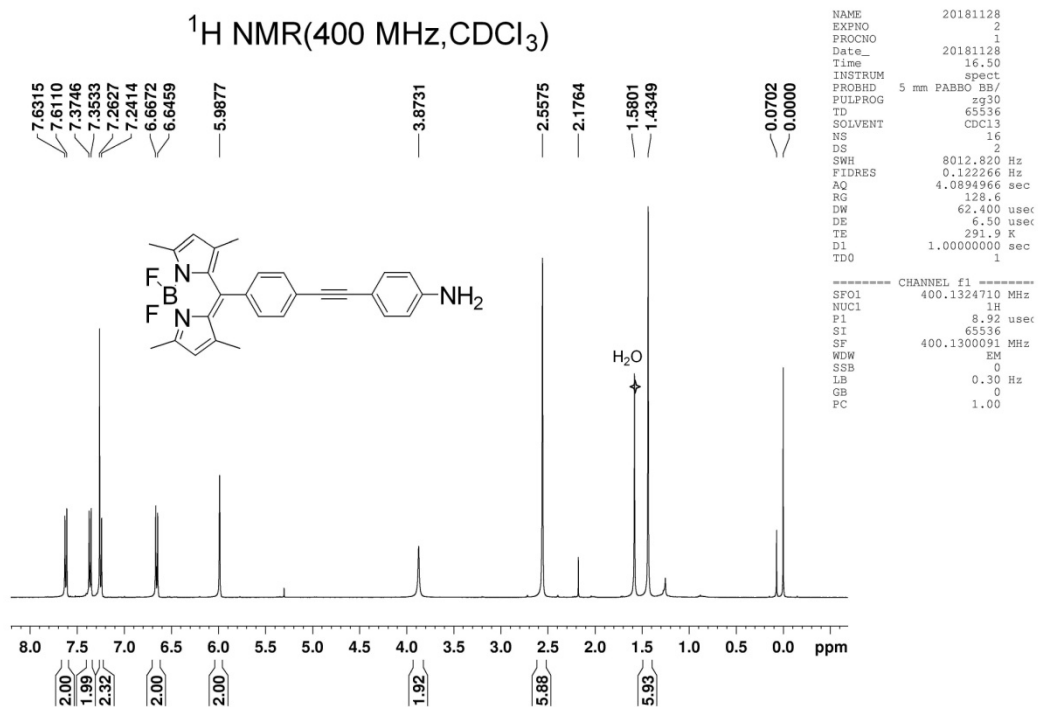

**Figure S30.** <sup>1</sup>H NMR of **5** in CDCl<sub>3</sub> (400 MHz).



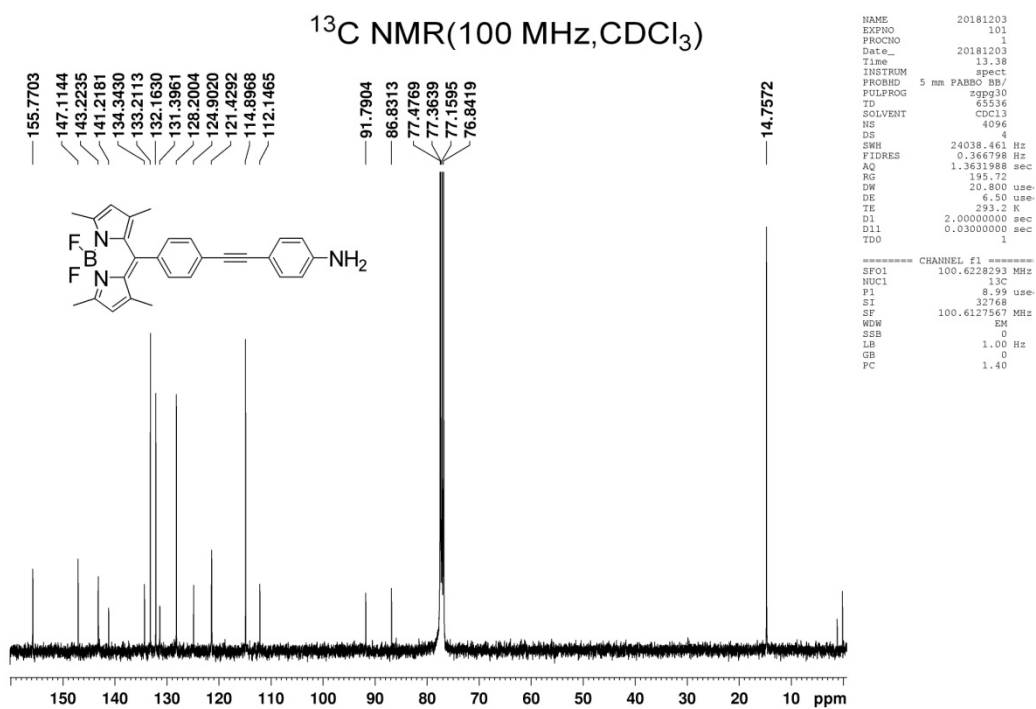

**Figure S31.** <sup>13</sup>C NMR of **5** in CDCl<sub>3</sub> (100 MHz).

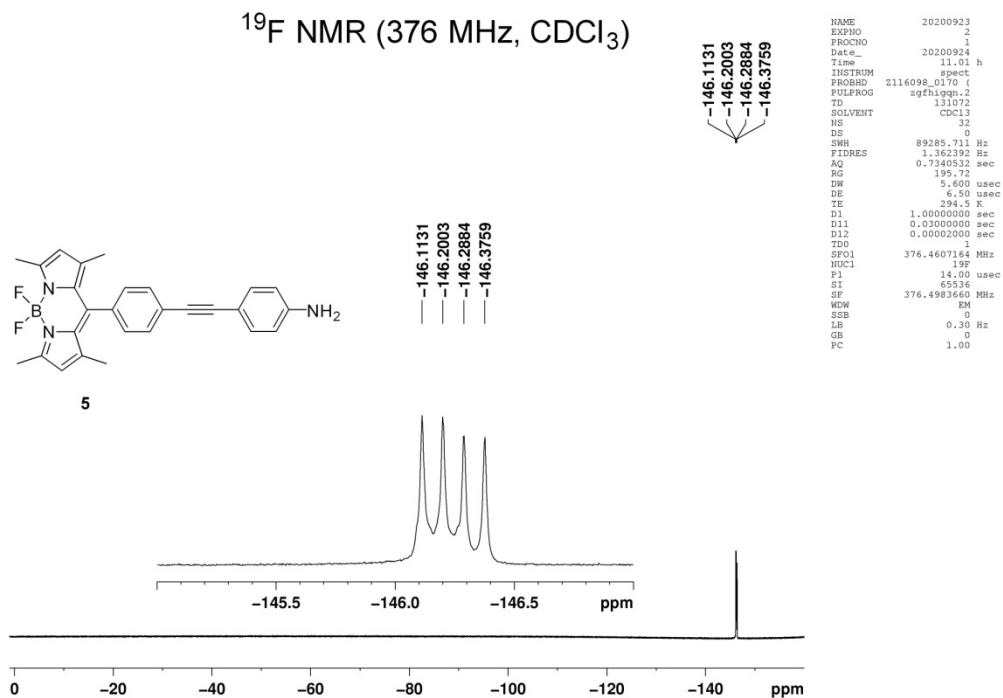

**Figure S32.** <sup>19</sup>F NMR of **5** in CDCl<sub>3</sub> (376 MHz).

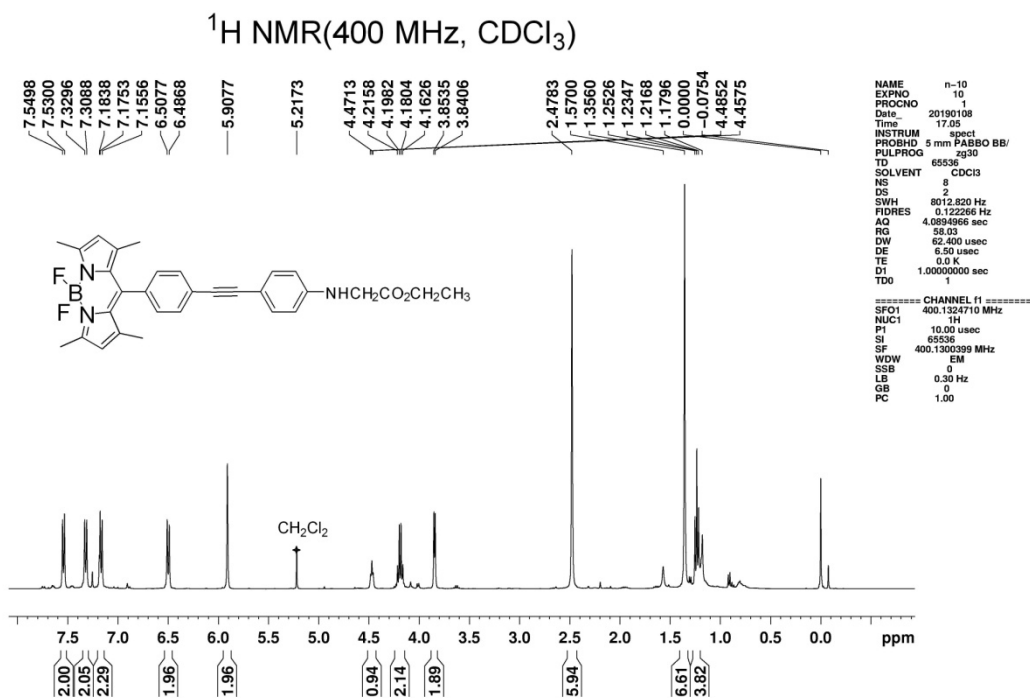

**Figure S33.** <sup>1</sup>H NMR of **6** in CDCl<sub>3</sub> (400 MHz).

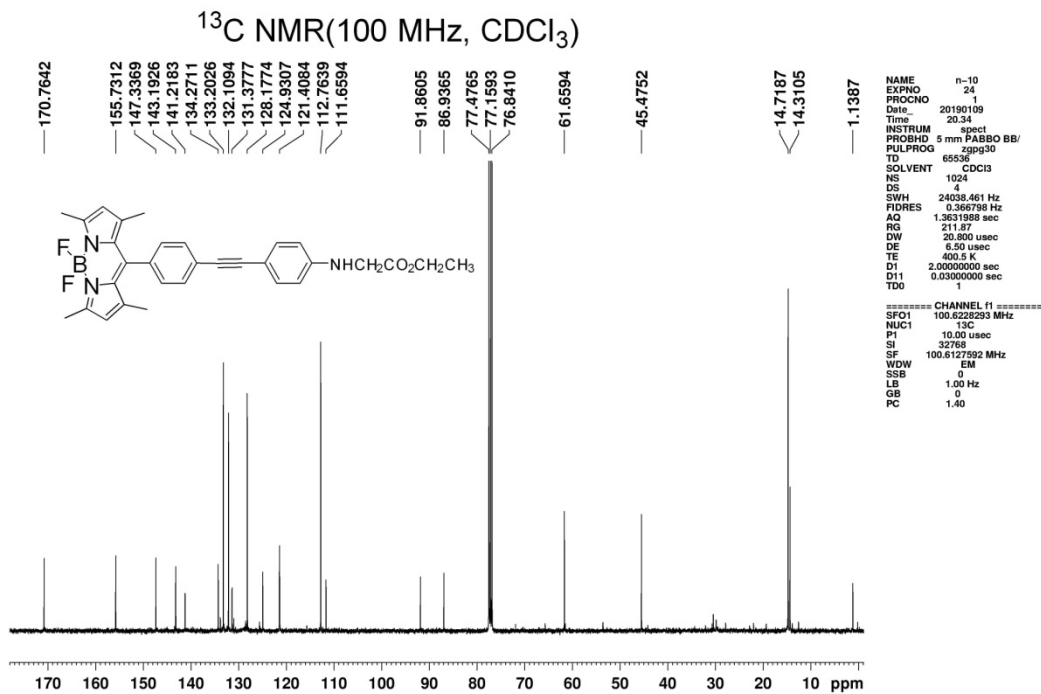

**Figure S34.** <sup>13</sup>C NMR of **6** in CDCl<sub>3</sub> (100 MHz).

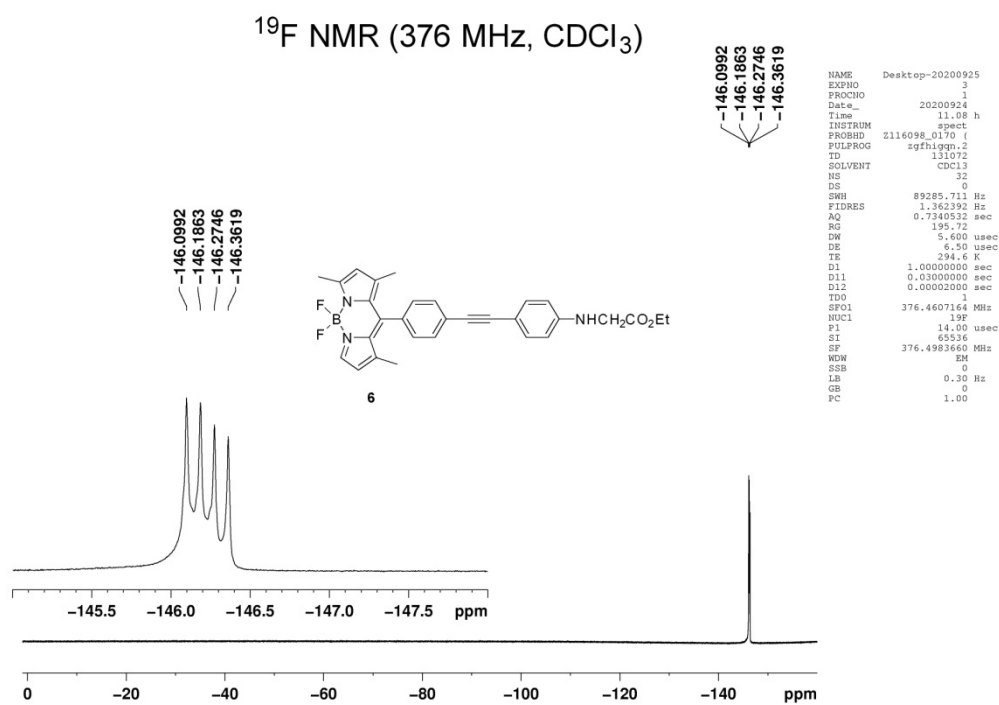

**Figure S35.**  $^{19}\text{F}$  NMR of **6** in  $\text{CDCl}_3$  (376 MHz).

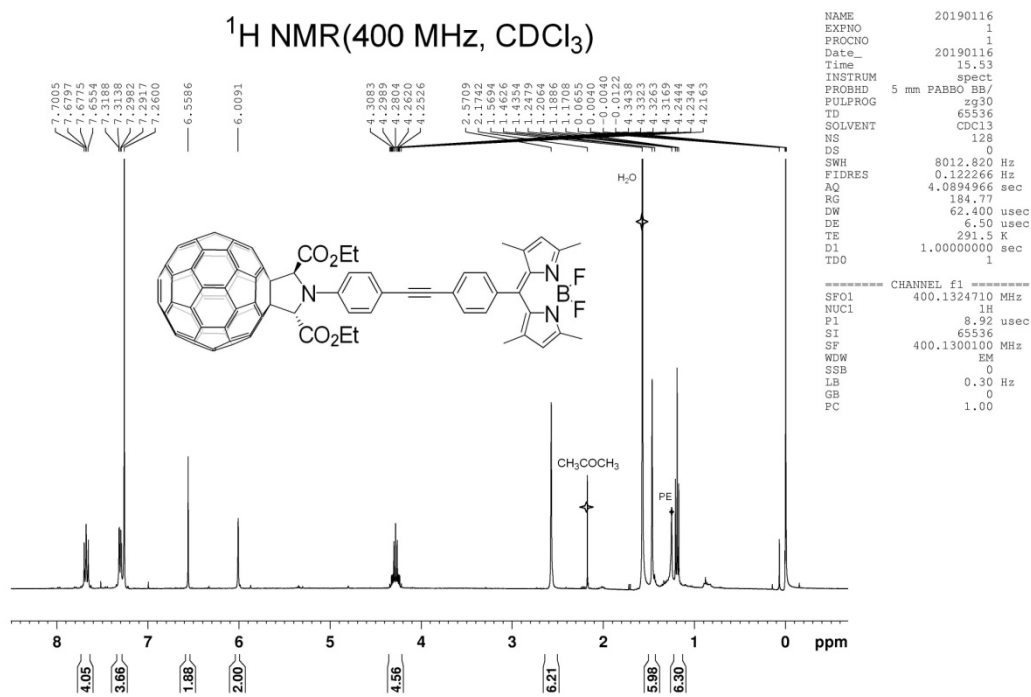

**Figure S36.**  $^1\text{H}$  NMR of **C<sub>60</sub>-B2** in  $\text{CDCl}_3$  (400 MHz).

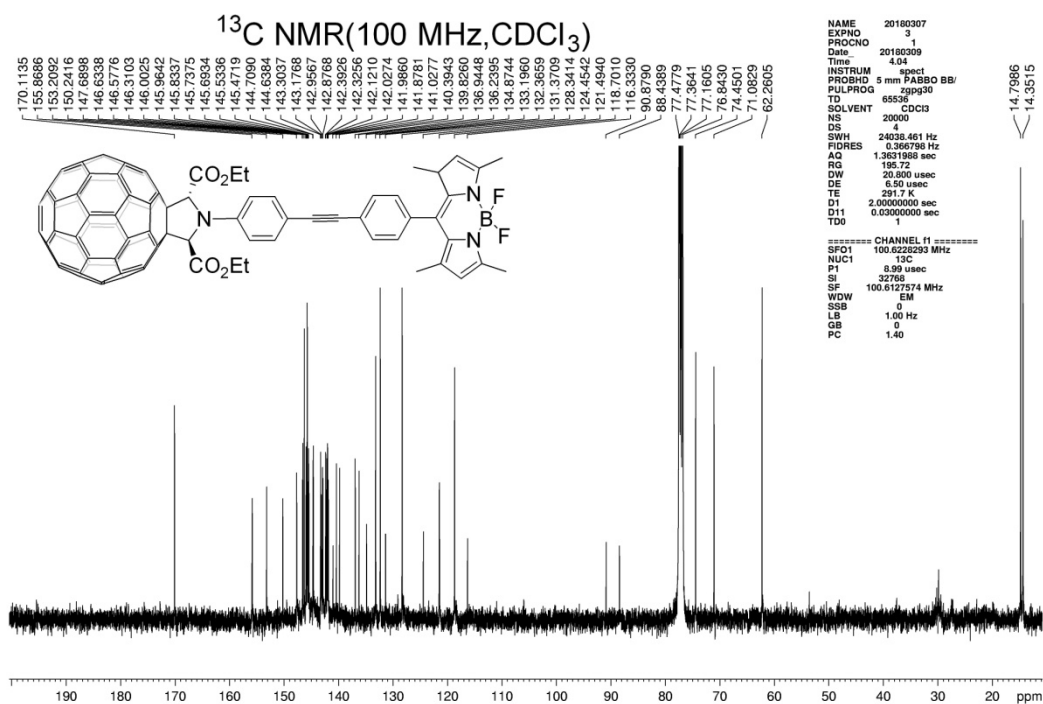

Figure S37. <sup>13</sup>C NMR of C<sub>60</sub>-B2 in CDCl<sub>3</sub> (100 MHz)

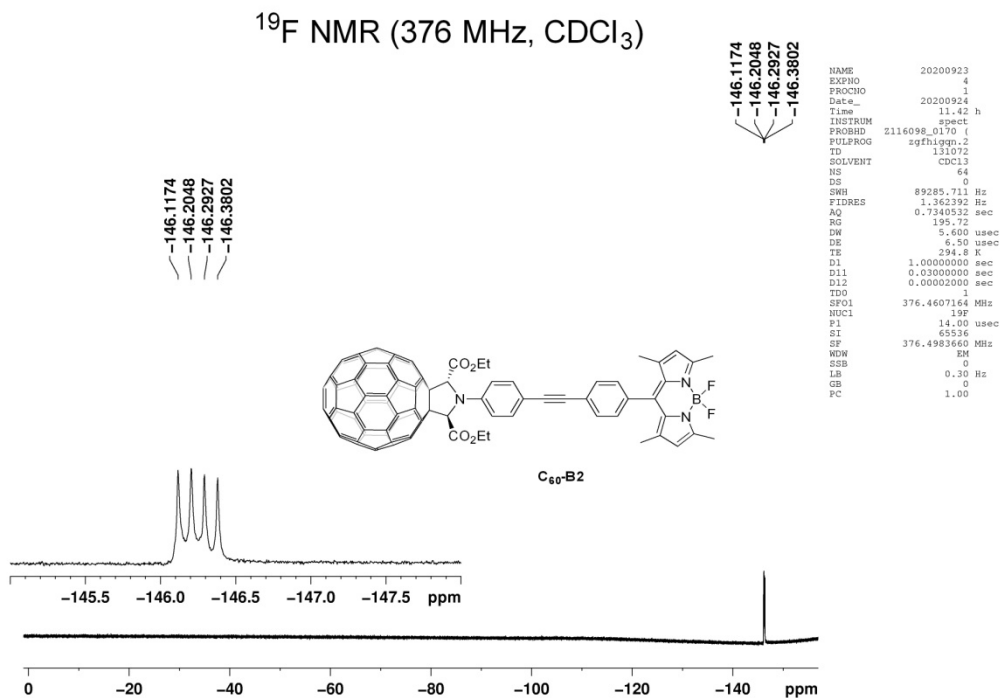

Figure S38. <sup>19</sup>F NMR of C<sub>60</sub>-B2 in CDCl<sub>3</sub> (376 MHz).
